# Supplementary material for: Eliciting views on antibiotic prescribing and resistance among hospital and outpatient care physicians in Berlin, Germany: results of a qualitative study
Source: PubMed Central journal article supplement — BMJ Open. 2012 Feb 3;2(1):e000398. doi: 10.1136/bmjopen-2011-000398 (PMC3274716; doi:10.1136/bmjopen-2011-000398), 2012-02-03
Supplement: bmjopen-2011-000398-s1.pdf [file bmjopen-2011-000398-s1.pdf]

## Supplemental 1: PreAnalysis Code Map

| Code-Category                                 | Code-Topic                     |                      |
|-----------------------------------------------|--------------------------------|----------------------|
|                                               | Sub-category                   | Theme                |
| General impressions on rising resistance      | General perception             | Acute treatment      |
|                                               |                                | Compliance           |
|                                               |                                | Costs                |
|                                               |                                | Diversification      |
|                                               |                                | Dosage-application   |
|                                               |                                | Effectiveness        |
|                                               |                                | Frequent prescribing |
|                                               |                                | Immunosuppressant    |
|                                               |                                | Interactions         |
|                                               |                                | Proof of pathogen    |
|                                               | Resistance                     |                      |
|                                               | Side effects                   |                      |
|                                               | Prescribing                    | General              |
|                                               |                                | GP                   |
|                                               |                                | HNO                  |
| Paediatrics                                   |                                |                      |
| Diagnoses                                     | Urology                        |                      |
|                                               | Angina                         |                      |
|                                               | Bronchitis                     |                      |
|                                               | Ear infections                 |                      |
|                                               | Sore throat                    |                      |
| Reasons for rising resistance                 | Streptococcal infections       |                      |
|                                               | UTI                            |                      |
|                                               | Antibiotic dosing              |                      |
|                                               | Antibiotics development        |                      |
|                                               | Cost of therapy                |                      |
|                                               | Diagnosis-specific             |                      |
|                                               | Epidemiology                   |                      |
|                                               | EU differences                 |                      |
|                                               | Hospital specific              |                      |
|                                               | Inadequate facilities          |                      |
|                                               | Incorrect prescribing practice |                      |
|                                               | Infectiousness                 |                      |
|                                               | Interventions                  |                      |
|                                               | Medical dialog and discussion  |                      |
|                                               | Multi-resistant pathogens      |                      |
|                                               | Patient noncompliance          |                      |
|                                               | Patient self-medication        |                      |
|                                               | Pharmaceutical general         |                      |
|                                               | Pharmaceutical marketing       |                      |
| Pharmaceutical packaging                      |                                |                      |
| Poor hygiene                                  |                                |                      |
| Social factors aging                          |                                |                      |
| Social factors food-industry                  |                                |                      |
| Social factors migration                      |                                |                      |
| Social factors travel                         |                                |                      |
| Specialty-specific                            |                                |                      |
| Outpatient-specific influences on prescribing | Symptoms and Diagnosis         | Experience           |
|                                               |                                | Knowledge            |

|                                                    |                                              |                                                                                                                                    |                                                                                                        |
|----------------------------------------------------|----------------------------------------------|------------------------------------------------------------------------------------------------------------------------------------|--------------------------------------------------------------------------------------------------------|
|                                                    |                                              | Laboratory                                                                                                                         |                                                                                                        |
|                                                    | Patient                                      | Age<br>Age<br>Comfort<br>Demand<br>History<br>History<br>Immigration<br>Travel                                                     |                                                                                                        |
|                                                    | Physician                                    | Consequences of inaction<br>Perception of patient<br>Safe side<br>Unclear symptoms                                                 |                                                                                                        |
|                                                    | Costs                                        | Health insurance<br>Laboratory<br>Pharmacy<br>Therapy                                                                              |                                                                                                        |
|                                                    | Pharmaceutical industry                      | Antibiotic choice<br>Clinical priority<br>Consulting<br>Marketing<br>Relationships and influence                                   |                                                                                                        |
| <b>Hospital-specific influences on prescribing</b> | Setting                                      | Colleague consult<br>Experience<br>Guidelines<br>Laboratory<br>Pharmacy regulations                                                |                                                                                                        |
|                                                    | Diagnoses                                    | General                                                                                                                            |                                                                                                        |
|                                                    | Internal Guidelines                          | Hospital policy<br>Pharmaceutical commissions<br>Updatedness<br>Use and usability                                                  |                                                                                                        |
|                                                    | External Guidelines                          | Disease and pathogens<br>Experience<br>No guidelines<br>Recommendations<br>Reliability-notoriety<br>Speciality-specific<br>Urgency |                                                                                                        |
|                                                    | Collegial Exchange                           | Availability<br>Feedback<br>Hospital structures<br>Laboratory microbiologists<br>Time constraint                                   |                                                                                                        |
|                                                    | Fear                                         | Time constraint<br>Unavailable consult<br>Unclear antibiotic application                                                           |                                                                                                        |
|                                                    | Pharmaceutical industry                      | Consulting<br>Marketing                                                                                                            |                                                                                                        |
|                                                    | <b>Sources of information on antibiotics</b> | Practice                                                                                                                           | Clinical experience<br>CMEs<br>Conferences<br>Medical education<br>Peer teaching<br>Specialty training |

|                                         |                            |                                                                                                                                                                                                       |
|-----------------------------------------|----------------------------|-------------------------------------------------------------------------------------------------------------------------------------------------------------------------------------------------------|
|                                         | Guidelines                 | Availability Accessibility<br>Flexibility<br>Safety and reliability<br>Use and usability                                                                                                              |
|                                         | Clinical reference manuals | Use and usability                                                                                                                                                                                     |
|                                         | Positive lists             | Flexibility<br>Orientation<br>Use and usability                                                                                                                                                       |
|                                         | Books                      | Handbooks<br>Reference                                                                                                                                                                                |
|                                         | Media                      | Medical journals<br>Pharmaceutical-leaflets<br>Specialty journals                                                                                                                                     |
|                                         | Internet                   | Clinical help<br>Independent<br>Institutional websites<br>New antibiotics<br>Pharmaceutical-based<br>Search engines<br>Speed<br>Time constraints                                                      |
| <b>Physician-oriented interventions</b> | Problems                   | Hygiene<br>Irrational prescribing<br>Patient non-compliance<br>Resistance development                                                                                                                 |
|                                         | General needs              | Build trust in patients (physician)<br>Improve informational sources<br>Patient education                                                                                                             |
|                                         | Physician education        | Access to microbiologists<br>Antibiotics education<br>CMEs<br>Communication<br>Improve informational sources<br>Professional exchange (conferences)<br>Regional epidemiology<br>Resistance<br>Therapy |
