# Supplementary material for: Eliciting views on antibiotic prescribing and resistance among hospital and outpatient care physicians in Berlin, Germany: results of a qualitative study
Source: PubMed Central journal article supplement — BMJ Open. 2012 Feb 3;2(1):e000398. doi: 10.1136/bmjopen-2011-000398 (PMC3274716; doi:10.1136/bmjopen-2011-000398), 2012-02-03
Supplement: bmjopen-2011-000398.draft_revisions.pdf [file bmjopen-2011-000398.draft_revisions.pdf]

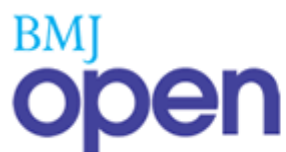

**Eliciting views on antibiotic prescribing and resistance from hospital and outpatient care physicians with focus groups**

|                                  |                                                                                                                                                                                                                                                                                                                                                                                                                               |
|----------------------------------|-------------------------------------------------------------------------------------------------------------------------------------------------------------------------------------------------------------------------------------------------------------------------------------------------------------------------------------------------------------------------------------------------------------------------------|
| Journal:                         | <i>BMJ Open</i>                                                                                                                                                                                                                                                                                                                                                                                                               |
| Manuscript ID:                   | bmjopen-2011-000398                                                                                                                                                                                                                                                                                                                                                                                                           |
| Article Type:                    | Research                                                                                                                                                                                                                                                                                                                                                                                                                      |
| Date Submitted by the Author:    | 21-Sep-2011                                                                                                                                                                                                                                                                                                                                                                                                                   |
| Complete List of Authors:        | Velasco, Edward; Robert Koch Institute, Department for Infectious Disease Epidemiology<br>Ziegelmann, Antina; Federal Ministry of Health, 3Division for Communicable Diseases, AIDS, Prevention of Epidemics<br>Eckmanns, Tim; Robert Koch Institute, Department for Infectious Disease Epidemiology Berlin, Germany<br>Krause, Gérard; Robert Koch Institute, Department for Infectious Disease Epidemiology Berlin, Germany |
| <b>Primary Subject Heading</b> : | Qualitative research                                                                                                                                                                                                                                                                                                                                                                                                          |
| Keywords:                        | GENERAL MEDICINE (see Internal Medicine), INFECTIOUS DISEASES, Infection control < INFECTIOUS DISEASES, CHEMOTHERAPY                                                                                                                                                                                                                                                                                                          |
|                                  |                                                                                                                                                                                                                                                                                                                                                                                                                               |

SCHOLARONE™  
Manuscripts

only

1  
2  
3 1 Submission format for BMJ Open: Qualitative Research Article

4 2  
5 3 **Eliciting views on antibiotic prescribing and resistance from hospital and outpatient care**  
6 4 **physicians with focus groups**

7 5  
8 6 Edward Velasco, social epidemiologist 1,2, Antina Ziegelmann, microbiologist<sup>3</sup>, Tim Eckmanns, medical  
9 7 epidemiologist<sup>1</sup>, Gérard Krause, medical epidemiologist<sup>1</sup>

10 8  
11 9 1Department for Infectious Disease Epidemiology, Robert Koch Institute, Berlin, Germany

12 10 2Faculty of Medicine Charité Universitätsmedizin Berlin, Germany

13 11 3Division for Communicable Diseases, AIDS, Prevention of Epidemics, Federal Ministry of Health, Berlin,  
14 12 Germany

15 13  
16 14 Correspondence to: E Velasco velasco@post.harvard.edu

17 15  
18 16 *The authors assure that all authors included on this paper fulfil the criteria of authorship. In addition we assure*  
19 17 *that there is no one else who fulfils the criteria but has not been included as an author.*

20 18 **Short title:** Physicians views on antibiotic prescribing and resistance

21 19  
22 20  
23 21 **ABSTRACT**

24 22  
25 23 **Objective** To provide a current assessment of physicians' views on factors of influence for the prescribing of  
26 24 antibiotics and on antibiotic resistance

27 25  
28 26 **Design** Qualitative study with focus groups of 7 GPs, 2 urologists, 1 paediatrician from outpatient care; 8  
29 27 internists, 2 paediatricians, 2 ENTs, 1 urologist from hospital care, all within the German health care system

30 28  
31 29 **Results** Physicians showed differential interest in topics related to antibiotic prescribing and antibiotic resistance.  
32 30 Outpatient care physicians were interested in topics around their own prescribing, such as being able to diagnose  
33 31 and prescribe precisely, and topics about patient demand and noncompliance. Hospital care physicians were  
34 32 interested in hygiene challenges, limited consult time and multi-resistant pathogens. A major topic in both groups  
35 33 was the development of antibiotics for specific indications.

36 34  
37 35 **Conclusions** Physicians in this sample considered the development of resistance to be more in the domain of  
38 36 clinical treatment than that of the patient. Major challenges that play a role in the context of antimicrobial  
39 37 resistance for physicians are access to and clarity of treatment recommendations, implementation of hygienic  
40 38 measures, as well as increased outsourcing of laboratory services. Results suggest that in Germany physicians  
41 39 may be the key target group for intervention that aims to influence antimicrobial resistance. This is remarkable  
42 40 because in other countries intervention to reduce antimicrobial resistance has often been targeted at the patient  
43 41 directly. There is a need to revisit current approaches to intervention methods so that they are sensitive to  
44 42 evolving socio-behavioural factors for physician antibiotic prescribing.

45 43  
46 44 **Keywords** antibiotic prescribing, antibiotic resistance, hospital care, outpatient care, social factors, qualitative  
47 45 research

48 46 **Word counts** Abstract (247); Manuscript (3755)

## ARTICLE SUMMARY

### Article Focus

- Overuse of antibiotics across many specialities and in some of the most common diagnoses remains a driving force for antibiotic resistance
- While much attention has focused on limiting use and addressing clinical concerns like improving point-of-care diagnostic tests, prior literature has largely left out the consideration of socio-behavioural factors that influence physicians in their choice to prescribe antibiotics
- Physicians' views on factors that influence their prescribing of antibiotics and antibiotic resistance were assessed with focus group discussions

### Key Messages

- Physicians are interested in help for making the right decisions on the appropriate measures for mitigating patient discomfort and risk
- Well-informed prescribing practice is influenced by structural (e.g. overcrowding in hospitals) as well as non-structural factors (e.g. access to feedback from microbiologists or patient consult time)
- Physicians desire intervention activities that address their own skills, like assessment of patient needs, time management for consult and navigation of pharmaceutical consulting

### Strengths and Limitations

- Participants were recruited from diverse physician specialities from both the hospital and outpatient care setting, from different age groups and those treating diverse patient populations
- The study utilised up-to-date methodologies for focus group analysis, including a comprehensive plan for ensuring validity in data making and data reduction
- A replicable model was provided; showing how to use an open-source, free software that can be applied to similar research efforts
- Focus group participants are all from the Berlin metropolitan area and physicians from other regions, particularly rural areas, may present different experiences and views.

## INTRODUCTION

Antimicrobial use has remained a major concern in medicine and epidemiology over the last years. Surveillance initiatives have been implemented in order to monitor antimicrobial consumption and usage patterns and resistance data for selected pathogens in order to present trends over time and comparisons between countries and regions.<sup>1,2</sup> The results provide evidence that antimicrobial resistance has continued to persist across all specialities and in some of the most common diagnoses. Efforts to combat resistance have focused on limiting antimicrobial use, providing patient education about appropriate use, and developing better point of care tests. But there are other factors of antimicrobial use and resistance, which should also be a core part of campaigns that attempt to monitor resistance in both hospital and outpatient care settings.<sup>3,4,5,6</sup>

In 2007 the Robert Koch Institute (RKI), the federal public health institution in Germany, initiated a number of different studies to investigate factors to be considered when designing a national strategy to prevent the spread of antimicrobial resistance. The aim was to use different methodological approaches to describe prescribing behaviours for antimicrobials as well as factors of influence for antibiotic prescribing and antibiotic resistance in Germany. To complement a nationally representative, quantitative cross-sectional survey with 10,600 physicians on the same topic<sup>7</sup> we conducted a qualitative study to generate in-depth exploratory information on this topic. Combining quantitative and qualitative approaches can help to better explore hard-to-gauge socio-behavioural factors of prescribing, especially social and cultural factors of epidemiology like aging, gender, geography, attitude, knowledge and behavioural factors.<sup>8,9</sup>

## METHODS

### Focus group conceptual structure

We conducted a literature review to identify previous work on socio-behavioural factors of influence for antimicrobial prescribing and to guide all further research. A conceptual structure was created to serve as the basis for designing further research studies on this topic, the first of which being focus group discussions. The five conceptual areas encompassed influence factors for: 1. General impressions of antibiotic resistance (e.g. How is the development of antibiotic-resistance perceived? How generally relevant is the topic of rising antibiotic-resistance?), 2. Prescribing in outpatient care (e.g. which influence factors are relevant for prescribing antibiotics? Which factors are relevant for prescribing in outpatient care?), 3. Prescribing in hospital care (e.g. which influence factors are relevant for prescribing antibiotics? Which factors are relevant for prescribing in hospital care?), 4. Information and knowledge about antibiotic treatment (e.g. what are sources of knowledge about antibiotics? How do physicians generally get informed about medical areas related to antibiotics?), 5. Impressions on problematic areas of concern (e.g. Where are problem areas in antibiotics and antibiotic resistance addressed? Which factors should be addressed by potential interventions to combat antibiotic resistance?). Please see tables 1 and 2.

### Focus group participants

Purposive sampling was used to recruit physicians from diverse backgrounds with respect to sex, age, specialty, practice type, the number of patients seen quarterly, and location of practice (former East or West Germany). All physicians were recruited from Berlin metropolitan area. Physicians were offered monetary compensation of 200 Euros. A qualitative research agency (H,T,P, Concept<sup>10</sup>) was employed to draw a sample of physicians, moderate and transcribe the group discussion sessions.

We conducted four focus group sessions of 5-7 physicians each: Group one, "Outpatient setting: less experience:" practice-experience from 5-12 years; a mix of single and group practice; 3 GPs, 1 paediatrician, 1 urologist; 2 women, 3 men. Group two, "Outpatient setting: more experience:" practice-experience from 12 years; a mix of single and group practice; 4 GPs, 1 urologist; 3 women, 2 men. Group three, "Hospital setting: less experience:" practice-experience from 3-10 years; 4 internists, 1 paediatrician, 1 ENT, 1 urologist; 2 women, 5 men. Group four, "Hospital setting: more experience:" practice-experience from 10 years, 4 internists, 1 paediatrician, 1 ENT; 1 woman, 6 men. Please see table 1 and 2 for details on focus group participants.

### Interview methodology

The focus groups were held between December 4 and 6, 2007 in Berlin, and were facilitated in 4 sessions of 2 hours each. All sessions were held separately and conducted by a trained moderator. For each discussion, moderators used a semi-structured framework based on the topics from the five conceptual areas, but allowed participants in each group to explore topics differentially. Interviews were transcribed in real-time, and each session was video-recorded. To selectively check for accuracy of the text in each transcription, 6 random samples of 5-7 minutes were chosen from the video-footage of each focus group, and then checked against the corresponding text.

## 155 Data Analysis

156

157 A preliminary analysis of transcribed data was completed. This firstly consisted of examining the data based on  
158 the five conceptual areas and the respective study questions set out before beginning this research. We were  
159 able to draw key relationships between conceptual areas, so called “code-categories” under which were assigned  
160 individual topics arising from the content of the focus group discussions. The resulting framework was used to  
161 guide all subsequent data-making and analysis tasks.

162 A pre-analysis code map was developed from the framework, showing a hierarchy from the five code-categories  
163 to each topic and sub-topic. (The code map is provided online as supplementary data.) The code map was then  
164 created, to be used later for constant comparative analysis—an iterative method of content analysis where each  
165 category is searched and constantly revised, popularly used to allow so called “emergent codes” to be applied at  
166 all points in the analysis.<sup>11;12</sup> Before beginning the analysis, we validated our code map by performing a code  
167 check, looking for duplicates and comparing codes to the topics within the aforementioned framework. Revisions  
168 were made and a resulting code map was used for subsequent data making. Please see Figure 1: Plan for data-  
169 making, data reduction and analysis.

170 All text from transcripts was subjected to constant comparative analysis, as described above. The frequencies of  
171 codes were used as a measure of significance. Additionally, quotations were collected from all transcripts when a  
172 specific topic involved multiple sentences, when the comment provided was provocative or when it involved more  
173 than 2 individuals in dialog. All data making and content analyses were done using TAMS Analyzer for Macintosh  
174 OS X, an open-source, computer-assisted qualitative research tool (version 4.13).<sup>13</sup>

175

## 176 RESULTS

177

178 Table 3 provides a detailed overview of the highest incident emergent codes and code-categories from constant  
179 comparison analysis for all focus groups combined. Those results stratified by each focus group are presented in  
180 the following section.

181 Outpatient care physicians with fewer years of practice experience (focus group 1) discussed topics  
182 within the category of outpatient-specific influences on prescribing 146 times. Subsequent categories discussed  
183 by this group were: general impressions on rising resistance (115), sources of information on antibiotics (64), and  
184 physician-oriented interventions (17).

185 The most frequently discussed topics in this focus group were difficulties in dealing with complicated patient  
186 histories (12), patient compliance (9) and patient perception of treatment (8). Participants frequently discussed  
187 the development of antibiotic substances (11) and showed concern with showing responsibility in their own  
188 practice and prescribing of therapy (4). Participants also focused on specific diagnoses that are perceived to be  
189 driving resistance, with major discussion occurring around the topic of uncomplicated urinary tract infections  
190 (UTIs) (5).

191 Conferences (9) and pharmaceutical companies (4) were discussed most when it came to common  
192 sources of information on antibiotics. A large amount of time was spent talking about the nature of  
193 pharmaceutical representatives. This was described as a persistent, aggressive – yet specialty-specific approach:

194 ‘They come often and always have antibiotics on hand. You get a bag of them every day. And high doses  
195 of drugs. It all stacks up in the cabinet. For me there are 4 to 5 representatives each day.’ (1-3: i.e. Focus  
196 Group 1-Participant 3; please see tables 2 and 3 for participant details.)

197 ‘I notice that they approach me, too. But I do not accept them all. I would estimate that there are about 5-7  
198 every day, and they do bring whole bags full (of giveaways).’ (1-2)

199 'The representatives come into my practice. And you do listen to them. You even take the information they  
200 offer, even if with a critical eye. But you do learn something as well.' (1-5)

201 'The pharmaceutical industry is very aggressive.' (1-3)

202 'For urology I can not remember in recent months receiving a visit on this issue. But that is certainly very  
203 different than in the primary care sector.' (1-4)

204  
205 Participants from outpatient care with less experience most frequently saw feedback on their resistance situation  
206 and cooperation with laboratories (5) as ways to address the problem of rising antibiotic resistance.

207  
208  
209 Outpatient physicians with more years of practice experience (focus group 2) discussed those topics within the  
210 category of general impressions on rising resistance 150 times. Other categories in order of most to least frequent  
211 included: sources of information on antibiotics (126), outpatient-specific influences on prescribing (105), and  
212 physician-oriented interventions (28). In this group there was also some discussion around the category of  
213 hospital-specific influences on prescribing and mostly focused on problems specific to the hospital setting (8) and  
214 multi-resistance pathogens (6).

215 The topic of hygiene arose in each of the two outpatient focus groups, who agreed that antibiotic resistance  
216 was largely a problem of the hospital setting, "In hospitals resistance plays a bigger role because there one finds  
217 hospital specific germs." (1-4) Incidentally, the topic of resistance was often quickly averted when brought up,  
218 instead being commented as a problem specific to the hospital care setting:

219 'I think the development of resistance is more the domain of clinical treatment and not the patient.'  
220 (2-5)

221 'Exactly.' (2-3)

222 'Yeah, especially in intensive care.' (2-4)

223  
224 They also frequently discussed the effectiveness antibiotic substances and drug development (6). This group also  
225 talked about social factors that may be driving the situation, like increased foreign travel (6), over-the-counter  
226 availability of drugs abroad (4), and migration (4). The topic of UTIs also arose as a specific concern driving  
227 resistance (4).

228  
229 Physicians in this group valued information that is concise and available to them in a way that complements their  
230 work without taking up too much time:

231 'Is there a new antibiotic? What is the resistance situation? Which organisms are being affected?  
232 What are the indications, what are the side effects? The interactions with other drugs? Are there  
233 alternatives? If this information could be given to us in a short and sweet way, then we would be  
234 happy. Something like this is not currently available to us.' (2-1)

235  
236 Participants discussed most frequently that patient demand (11) is a major driver for prescribing in the outpatient  
237 setting, followed by doctor experience (9) and specific diagnoses (6). The role of the patient, including patient  
238 non-compliance and self-medication also emerged. Physicians discussed two types of patients: those concerned  
239 with getting an antibiotic, and those concerned with avoiding what they think is harmful:

240 'Pressure from patients is not insignificant...the worst are the mothers where the children are really  
241 very sick and the mothers say: I don't want any chemotherapy. The lymph nodes are thick with pus,  
242 almost hanging out, and then the mother says no, no antibiotics for us. That's bad.' (2-1)

243  
244 Participants in focus group 2 found treatment guidelines (8), pharmaceutical based materials (5) and conferences  
245 (4) to be main sources of information on antibiotics. This group found information from pharmaceuticals to be  
246 concise, and readily available:

247 'There's been a big change from the expertise of representatives who come in. These are all  
248 clinicians and they do not give a bad impression at all. They bring me a lot of information although,  
249 of course, you have to make sense of it all. But I do admit that I feel as though I am getting good



1  
2  
3 250 consulting. Because I don't have the time to do my own research nor to sit down on the Internet  
4 251 every evening. I am very grateful for the very specific information they offer me.' (2-2)  
5 252

6 253 Increased surveillance (9), including information on their regional resistance situation (5), constraints on their  
7 254 consulting time (3), and consulting (2) were found to be the most often discussed recommendations for  
8 255 intervention. There was discussion that patient outreach is not needed in Germany (2), but they discussed the  
9 256 need to have more access to surveillance of their local resistance situation:

10 257 'I think we need what there was in (the former) East Germany, a short, independent information  
11 258 sheet that shows the current epidemiological situation in the country or the region where I live.' (2-  
12 259 5)  
13 260  
14 261

15 262 Hospital physicians with fewer years of experience (focus group 3) most frequently discussed their general  
16 263 impressions on rising resistance (70), hospital-specific influences on prescribing (40), sources of information on  
17 264 antibiotics (15), and physician-oriented interventions (12). Patient non-compliance (8), correct prescribing and  
18 265 antibiotic dosing (5), hospital care (3) and hygiene (3) were the most frequently addressed topics.

19 266 The Internet (3), pharmaceutical advertising (2) and conferences (2) were listed as the most frequent physician-  
20 267 oriented interventions mentioned by this group. The visibility of pharmaceutical advertising was also discussed,  
21 268 and this group found it on the whole easy to access and useful for learning. (3-7) Participants overwhelmingly  
22 269 stayed with the topic of hospital workplace concerns, like hygiene (7) and time for patient-consult (4) as the most  
23 270 needed intervention to combat resistance in their setting. Non-structural demands on the hospital, such as  
24 271 advances in treatment possibilities for more complex indications, might necessitate more antibiotics consumption  
25 272 in the hospital setting, which may in turn itself be a driver for resistance.

26 273 The hospital itself was viewed as having structural aspects that might contribute to increased antibiotic  
27 274 use and resistance (7). One such aspect, maintaining hygiene, was a perceived danger of interrelated issues of  
28 275 increased patient load (3), patient-patient contact (1) and infectiousness (2). One physician noted that the  
29 276 pressure to treat more patients has led to a related need for a faster consult time, which may put strain on the  
30 277 thoroughness of hospital hygiene measures (4-1). Hospital physicians also pointed out that they would prefer to  
31 278 pursue intervention through new programs for hygiene, although they also recognise it to be a challenging method  
32 279 of improvement (3-7).  
33 280

34 281 Hospital physicians with more years of experience (focus group 4) discussed most frequently about their general  
35 282 impressions on rising resistance (66), followed by hospital-specific influences on prescribing (29), sources of  
36 283 information on antibiotics (27), and physician-oriented interventions (21). The most frequent topics brought up by  
37 284 this group were diagnostics possibilities (5), patient history/epidemiology (increasingly acute cases in care) (4)  
38 285 and social factors like aging (4). When talking about the influence on prescribing in hospital care, the following  
39 286 topics were most frequent: indication and disease (2), risk assessment in acute cases (2), specificity of guidelines  
40 287 (2) and time constraints during patient consultation (2).

41 288 Specialty journals (9), clinical handbooks (3) and the Internet (3) were the most frequent topics to emerge  
42 289 under the category of hospital-specific influences on prescribing. Discussion points on hospital feedback on the  
43 290 resistance situation (5) and continuing education (2), especially in the area of hygiene (2) and infectious diseases  
44 291 (2) emerged most frequently in discussions regarding intervention for antibiotic resistance.

45 292 Collegial exchange with microbiologists/ laboratories (5) emerged as the most frequent topics under the  
46 293 category of hospital-specific influences on prescribing. All hospital physicians in our sample spoke about  
47 294 opportunities to closely collaborate with laboratories and microbiologists, who can be helpful in navigating  
48 295 antibiotics treatments:

1  
2  
3 296 The micro-biologists that we have are top. We mostly get reports via the doctor calling us before  
4 297 anything is published on our intranet. It is then also discussed, what underlying disease does the  
5 298 patient have, which antibiotic was given, and the provisional findings will be communicated first.  
6 299 Short, quick ways; you have to communicate well with people.(4-1)

7 300  
8 301 Throughout the discussion of this category arose the topic of outsourcing of laboratories, which physicians  
9 302 perceived as prohibiting close communication and producing too much bureaucracy, "For us, it is unfortunately  
10 303 not the case. The laboratory has been outsourced. A service provider is at the other end of town; they can't  
11 304 communicate with us much." (4-5) Other dominant topics that emerged in the category were the role of the  
12 304 hospital pharmacist in influencing prescribing choices (4), followed by how often and appropriately  
13 305 internal/hospital antibiotic treatment guidelines are updated (4), and subsequently by multi-resistant pathogens  
14 306 (3).  
15 307  
16 308

17 309  
18  
19

## 20 310 DISCUSSION

21 311  
22 312 In similar studies throughout the past decade, research had underlined the importance of patient-oriented factors  
23 313 of influence for prescribing.<sup>14-16</sup> The focus has primarily been on patient demand and noncompliance. This is  
24 314 consistent with the historical data on the subject showing that antibiotics are more likely to be prescribed when the  
25 314 patient expects them, and that they may be even more likely to be prescribed when the doctor may perceive that  
26 315 the patient wants a prescription, when in fact the demands of patient are unclear.<sup>17</sup> Physicians in this sample  
27 316 showed differential interest in those topics related to their antibiotics prescribing and resistance.  
28 317

29 318 A major topic in both groups with outpatient physicians was their experience of increasingly difficult  
30 319 diagnoses in practice. The concern in our sample for the prevalence of UTIs and the related development of  
31 320 antibiotics for specific indications is important. UTIs are the dominant topic which emerged in the discussions  
32 321 among outpatient care physicians, which makes sense: the trend in many European studies of antimicrobial  
33 322 resistance show UTIs to be accountable for a large amount of antibiotics consumption.<sup>1</sup> Indeed, the cross-  
34 323 sectional survey component of this study showed UTI to be the overall most frequent diagnosis for which  
35 324 physicians chose to begin antibiotic treatment in patients.<sup>7</sup> Many of the common pathogens leading to UTIs such  
36 325 as *E. coli* (one of the most frequent), *P. mirabilis* and *K. pneumoniae* are increasingly becoming resistant to  
37 326 standard treatments, leading to higher use of wide-spectrum antibiotics.<sup>18,19</sup>

38 327 Outpatient physicians frequently commented that resistance is primarily a problem of the hospital setting,  
39 328 related to the presence of different multi-resistant pathogens and challenges with hygiene. Not surprisingly, this  
40 329 was a major topic among hospital physicians in this sample. The increasing prevalence of multi-resistant  
41 330 pathogens is of particular concern, especially given the views that the hospital ward is increasingly faced with  
42 331 more patients at any single time, and that patients—many of whom are carrying more complex indications—are  
43 332 also expected to be seen in shorter consult times.<sup>20,21</sup>

44 333 Some hospital care physicians were familiar with regular and easy collaboration with microbiologists  
45 334 when discussing indications and possibilities for therapy. Laboratories also enabled the provision of information  
46 335 on the resistance situation for their hospital via regular communication channels, such as staff meetings and  
47 336 Intranet services. Other physicians, however, complained that increased outsourcing of diagnostics and other  
48 337 laboratory services from hospitals prohibited them from close collaboration and from having an overview of their  
49 338 local resistance situation. For the outpatient care setting, this was more problematic, where participants described  
50 339 needing better access to their local resistance situation.

51 340 It has remained unclear how large the current influence of the pharmaceutical industry is on physicians in  
52 341 Germany. In this sample, we learned that the pharmaceutical industry plays a large role in outpatient care  
53 342 practice. Visits to doctor's offices by the industry and free samples of antibiotics are ubiquitous; their informational



1  
2  
3 343 materials are generally perceived as attractive. This may be associated with the fact that information from the  
4 344 industry presents information in ways that is more convenient than scientific literature on the same topics.<sup>22</sup>  
5 345 Despite some caution about the persistence of the industry, most outpatient care physicians welcome their  
6 346 assistance, and view them as another resource among many other sources of information on antibiotics.<sup>7</sup>  
7 347 There was differential discussion about treatment guidelines, which may also be an important influence factor on  
8 348 physician prescribing practice. Participants from the outpatient care setting viewed clinical recommendations to be  
9 349 difficult to access quickly and use. For the hospital setting, this was significantly different. There was more  
10 350 discussion about whether guidelines are up-to-date, and about their relevance, specificity and availability to  
11 351 clinical practice. There are many guidelines with varying degrees of quality available to physicians. Hospital care  
12 352 physicians have an array of in-house developed guidelines, differentially taking into account local resistance  
13 353 data.<sup>23</sup> But, as also evidenced by other studies availability is differential and should be addressed separately for  
14 354 each setting.<sup>4,24</sup>  
15  
16  
17  
18  
19

## 20 355 21 356 **CONCLUSION**

22 357  
23  
24 358 Our findings show that outpatient care physicians in our sample were interested in topics around their own  
25 359 prescribing, like physician-sensitivity to patient need, time management for patient consult, access to guidelines  
26 360 and their perception of the pharmaceutical industry. These socio-behavioural factors, when coupled with  
27 361 intervention for the hospital care setting (e.g. improving hygiene measures, easing diagnostics and cooperation  
28 362 with laboratories) are markedly different from past factors: they are physician-oriented. New intervention  
29 363 strategies that comprise these factors can thus inform innovative approaches in the field that complement years of  
30 364 prevention work among to educate patient populations.  
31  
32  
33

## 34 365 35 366 **STUDY LIMITATIONS**

36 367  
37  
38 368 Although the same moderator conducted all focus group discussions based on a conceptual framework drawn  
39 369 before the sessions, there could be issues of reliability due to its application to 4 different groups of physicians.  
40 370 But, since we intended for the moderator to allow for participants in each group to explore topics differentially  
41 371 around this framework, so that any new or previously unanticipated topics could come up, we believe that this  
42 372 provided a major strength that is unique to this qualitative approach.  
43  
44

45 373 To address the challenges of validity in our data making and analysis, we employed a comprehensive  
46 374 plan for data-making, data reduction and analysis that allowed for cyclical and repeated checks. This included a  
47 375 cope map, which was reviewed by 2 epidemiologists. (Please see figure 1.)  
48  
49

50 377 **Acknowledgements** We thank the following individuals for cooperating on this research effort: Werner  
51 378 Espelage, Kirsten Heckenbach, Jürgen Hoffmann, Michael Kramer and Ines Noll.  
52 379

53 380 **Funding** This research was funded by a departmental grant from the Federal Ministry of Health. The study  
54 381 sponsors had no role in the study design or in the collection, analysis, and interpretation of data; in the writing of  
55 382 the report, nor in the decision to submit the article for publication.  
56 383

57 384 **Competing interests** None  
58 385

59 386 **Ethical approval** This study was approved by the institutional commission for data protection of the Robert  
60 387 Koch Institute. All participants gave informed consent before taking part in focus group discussions.  
388

389 **Data access** all authors had full access to all of the data (including statistical reports and tables) in the study  
390 and can take responsibility for the integrity of the data and the accuracy of the data analysis.

**Contributors** EV completed all analysis and drafted the manuscript. AZ, TE and GK conceived of the study and obtained funding. All authors contributed to the study design, the carrying out of the study, and provided critical feedback to the manuscript.

**Provenance and peer review** Not commissioned; externally peer reviewed.

**Data sharing statement** No additional data available.

**[Figure 1 Plan for data-making, data reduction and analysis]**

**Table 1** Focus group participant details: outpatient care

| Focus Group | Participant ID | Sex | Age | Specialty   | Practice type | Years in Practice | Location | Patients per quarter |
|-------------|----------------|-----|-----|-------------|---------------|-------------------|----------|----------------------|
| 1           | 1              | F   | 46  | Paediatrics | Group         | 12                | East     | ca. 900              |
|             | 2              | F   | 35  | GP          | Group         | 5                 | West     | ca. 200              |
|             | 3              | M   | 48  | GP          | Single        | 9                 | East     | ca. 1000             |
|             | 4              | M   | 54  | Urology     | Single        | 11                | West     | ca. 1200             |
|             | 5              | M   | 40  | GP          | Group         | 10                | West     | ca. 800              |
| 2           | 3              | F   | 55  | GP          | Group         | 16                | East     | ca. 150              |
|             | 4              | F   | 42  | GP          | Group         | 15                | East     | ca. 180              |
|             | 2              | F   | 53  | Urology     | Group         | 15                | West     | ca. 800-900          |
|             | 1              | M   | 62  | GP          | Group         | 25                | West     | ca. 2000             |
|             | 5              | M   | 57  | GP          | Single        | 15                | East     | ca. 800-900          |

**Table 2** Focus group participant details: hospital care

| Focus Group | Participant ID | Sex | Age | Specialty/ Position     | Number of beds | Years in Practice | Location | Patients per quarter |
|-------------|----------------|-----|-----|-------------------------|----------------|-------------------|----------|----------------------|
| 3           | 1              | F   | 40  | Paediatrics/Consultant  | 1200           | 8                 | West     | ca. 600-700          |
|             | 2              | M   | 34  | Internal/Resident       | 620            | 5                 | West     | ca. 400              |
|             | 3              | M   | 43  | Internal/ Consultant    | 538            | 9                 | East     | ca. 500              |
|             | 4              | M   | 42  | Internal/ Resident      | 626            | 4                 | West     | ca. 300-400          |
|             | 5              | F   | 34  | Internal/ Resident      | 363            | 3.5               | West     | ca. 400              |
|             | 6              | M   | 30  | ENT/ Resident           | 1200           | 3                 | East     | ca. 350              |
|             | 7              | M   | 43  | Urology/ Consultant     | 220            | 12                | West     | ca. 500              |
| 4           | 1              | M   | 51  | Internal/ Consultant    | 538            | 16                | West     | ca. 500              |
|             | 2              | F   | 40  | Internal/ Consultant    | 1200           | 14                | East     | ca. 1000             |
|             | 3              | M   | 56  | Internal/ Consultant    | 276            | 31                | West     | ca. 500              |
|             | 4              | M   | 48  | ENT/Consultant          | 1000           | 10                | West     | ca. 1400             |
|             | 5              | M   | 41  | Internal/ Consultant    | 1200           | 10                | West     | ca. 1000             |
|             | 6              | M   | 44  | Paediatrics/ Consultant | 542            | 16                | West     | ca. 300-500          |
|             | 7              | F   | 63  | Urology/ Consultant     | 1200           | 37                | East     | ca. 4000             |

**Table 3** Top 5 highest incident emergent codes and categories from constant comparison analysis (All groups combined; total codes n=1035)

| Code-Category                                 | 5 most frequent code-topics                  | Frequency |
|-----------------------------------------------|----------------------------------------------|-----------|
| General impressions on rising resistance      |                                              | 401       |
|                                               | Patient noncompliance                        | 15        |
|                                               | Antibiotics development                      | 13        |
|                                               | Hospital specific issues, e.g. hygiene, labs | 11        |
|                                               | Antibiotic dosing                            | 10        |
| Outpatient-specific influences on prescribing | Urinary tract infections                     | 10        |
|                                               |                                              | 251       |
|                                               | Patient history                              | 18        |
|                                               | Patient demand                               | 18        |
|                                               | Physician experience                         | 14        |
| Sources of information on antibiotics         | Patient self-educated                        | 11        |
|                                               | Patient compliance                           | 11        |
|                                               |                                              | 234       |
|                                               | Practice guidelines                          | 10        |
|                                               | Continuing medical education                 | 8         |
| Physician-oriented interventions              | Specialty journals                           | 8         |
|                                               | Internet                                     | 8         |
|                                               | Quality of conferences                       | 7         |
|                                               |                                              | 84        |
|                                               | Surveillance                                 | 9         |
| Hospital-specific influences on prescribing   | Laboratory feedback                          | 7         |
|                                               | Information on local resistance situation    | 7         |
|                                               | Hospital Hygiene                             | 4         |
|                                               |                                              | 4         |
|                                               | Up-to-date internal guidelines               | 4         |
|                                               | Laboratory/microbiologists exchange          | 4         |
|                                               | Specificity of Internal guidelines           | 4         |
|                                               | Experience with infectious diseases          | 3         |
|                                               | Problematic diagnoses                        | 3         |
|                                               |                                              | 65        |

419  
420  
421  
422

## Reference List

- 1  
2  
3 423  
4 424  
5 425  
6 426  
7  
8 427  
9 428  
10 429  
11 430  
12  
13 431  
14 432  
15 433  
16  
17 434  
18 435  
19  
20 436  
21 437  
22  
23 438  
24 439  
25 440  
26 441  
27  
28 442  
29 443  
30  
31 444  
32  
33 445  
34 446  
35  
36 447  
37 448  
38  
39 449  
40  
41 450  
42 451  
43  
44 452  
45 453  
46 454  
47 455  
48  
49 456  
50 457  
51  
52 458  
53 459  
54  
55 460  
56  
57 461  
58 462  
59  
60 463  
464  
465  
466
- (1) Ferech M, Coenen S, Malhotra-Kumar S, et al. European Surveillance of Antimicrobial Consumption (ESAC): outpatient antibiotic use in Europe. *J Antimicrob Chemother* 2006;58:401-407.
  - (2) Vander Stichele RH, Elseviers MM, Ferech M, et al. Hospital consumption of antibiotics in 15 European countries: results of the ESAC Retrospective Data Collection (1997-2002). *J Antimicrob Chemother* 2006;58:159-167.
  - (3) Cotter M, Daly L. Antibiotic prescription practices of general practitioners. *Ir Med J* 2007;100:598-601.
  - (4) Guerra CM, Pereira CA, Neves Neto AR, et al. Physicians' perceptions, beliefs, attitudes, and knowledge concerning antimicrobial resistance in a Brazilian teaching hospital. *Infect Control Hosp Epidemiol* 2007; 28:1411-1414.
  - (5) Hulscher ME, Grol RP, Van der Meer JW. Antibiotic prescribing in hospitals: a social and behavioural scientific approach. *Lancet Infectious Diseases* 2010;10:167-175.
  - (6) Harbarth S, Monnet DL. Cultural and socioeconomic determinants of antibiotic use. In: Gould IM, van der Meer J, eds. *Antibiotic Policies - Fighting Resistance*. Berlin: Springer 2007:39-40.
  - (7) Velasco E, Espelage W, Faber M, et al. A national cross-sectional study on socio-behavioural factors that influence physicians' decisions to begin antimicrobial therapy. *Infection* 2011;39:289-297.
  - (8) O'Donnel A, Luffey K, Marceau L, et al. Using focus groups to improve the validity of cross-national survey research: A study of physician decision making. *Qual Manag Health Care* 2007;:971.
  - (9) Kuper A, Reeves S, Levinson W. An introduction to reading and appraising qualitative research. *BMJ* 2008;337:288.
  - (10) H,T,P, Concept website: <http://www.inspirationformarketing.com/>; Access date: 21.09.2011.
  - (11) Leech N, Onwuegbuzie A. An array of qualitative data analysis tools: A call for data analysis triangulation. *Sch Psychol Q* 2007;22:557-584.
  - (12) Pope C, Van Royen P, Baker R. Qualitative methods in research on healthcare quality. *Qual Saf Health Care* 2002:148-152.
  - (13) TAMS website: <http://tamsys.sourceforge.net/>; Access date: 21.09.2011.
  - (14) Butler CC, Rollnick S, Pill R, et al. Understanding the culture of prescribing: qualitative study of general practitioners' and patients' perceptions of antibiotics for sore throats. *BMJ* 1998;317:637-642.
  - (15) Cockburn J, Pit S. Prescribing behaviour in clinical practice: patients' expectations and doctors' perceptions of patients' expectations--a questionnaire study. *BMJ* 1997;315:520-523.
  - (16) Harbarth S, Albrich W, Brun-Buisson C. Outpatient antibiotic use and prevalence of antibiotic-resistant pneumococci in France and Germany: a sociocultural perspective. *Emerg Infect Dis* 2002;8:1460-1467.
  - (17) Faber MS, Heckenbach K, Velasco E, et al. Antibiotics for the common cold: expectations of Germany's general population. *Euro Surveill* 2010;15:19655.
  - (18) Vasquez GA, Siu HR, Luna EM, et al. Risk factors for Quinolone-resistant *Escherichia coli* urinary tract infections. *Infect Dis Clin Pract* 2011;17:09-313.
  - (19) Hooper DC. Emerging mechanisms of fluoroquinolone resistance. *Emerg Infect Dis* 2001;7:337-341.
  - (20) Kern WV, Nink K, Steib-Bauert M, et al. Regional variation in outpatient antibiotic prescribing in Germany. *Infection* 2006;34:269-273.
  - (21) Goossens H, Ferech M, Vander SR, et al. Outpatient antibiotic use in Europe and association with resistance: a cross-national database study. *Lancet* 2005; 365:579-587.
  - (22) Avorn J, Solomon DH. Cultural and economic factors that (mis)shape antibiotic use: the nonpharmacologic basis of therapeutics. *Ann Intern Med* 2000;133:128-135.

- 1  
2  
3 467 (23) Deja M, Nachtigall I, Halle E, et al. Antibiotikatherapie - Strategien für die Verordnung von Antibiotika in  
4 468 der Intensivmedizin [Strategies in the treatment of infections with antibiotics in intensive care medicine].  
5 469 Anesthesiol Intensivmed Notfallmed Schmerzther 2007;42:108-115.  
6  
7 470 (24) Srinivasan A, Song X, Richards A, et al. A survey of knowledge, attitudes, and beliefs of house staff  
8 471 physicians from various specialties concerning antimicrobial use and resistance. Arch Intern Med 2004;  
9 472 164:1451-1456.  
10 473  
11 474  
12  
13  
14  
15  
16  
17  
18  
19  
20  
21  
22  
23  
24  
25  
26  
27  
28  
29  
30  
31  
32  
33  
34  
35  
36  
37  
38  
39  
40  
41  
42  
43  
44  
45  
46  
47  
48  
49  
50  
51  
52  
53  
54  
55  
56  
57  
58  
59  
60

For peer review only

1  
2  
3  
4  
5  
6  
7  
8  
9  
10  
11  
12  
13  
14  
15  
16  
17  
18  
19  
20  
21  
22  
23  
24  
25  
26  
27  
28  
29  
30  
31  
32  
33  
34  
35  
36  
37  
38  
39  
40  
41  
42  
43  
44  
45  
46  
47  
48  
49  
50  
51  
52  
53  
54  
55  
56  
57  
58  
59  
60

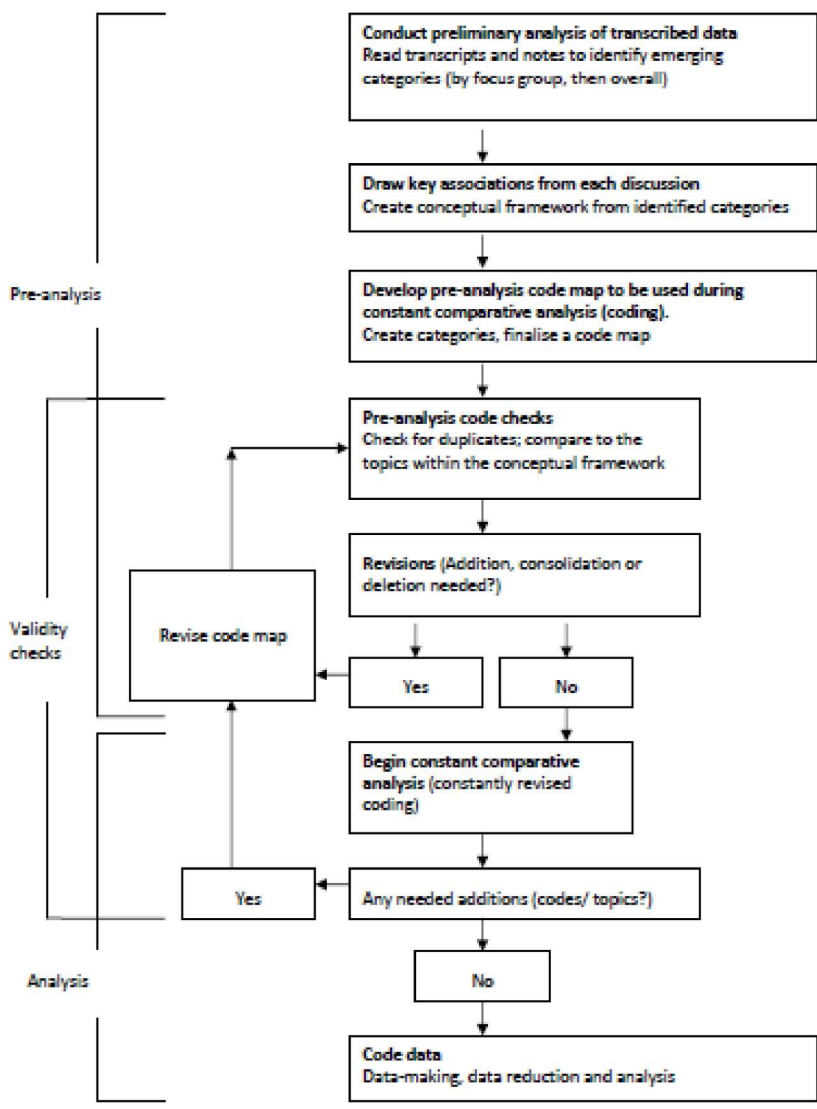

Figure 1 Plan for data-making, data reduction and analysis  
194x264mm (300 x 300 DPI)



# Qualitative research

These are the questions that BMJ editors should consider when appraising papers presenting original qualitative research (although we don't routinely use a checklist for this):

- Was the research question clearly defined? **YES**
- Overall, did the researcher make explicit in the account the theoretical framework and methods used at every stage of the research? **YES**
- Was the context clearly described? **YES**
- Was the sampling strategy clearly described and justified? **YES**
- Was the sampling strategy theoretically comprehensive to ensure the generalisability of the conceptual analysis (diverse range of individuals and settings, for example)? **YES**
- How was the fieldwork undertaken? Was it described in detail? **YES**
- Could the evidence (fieldwork notes, interview transcripts, recordings, documentary analysis, etc) could be inspected independently by others: if relevant, could the process of transcription be independently inspected? **YES**
- Were the procedures for data analysis clearly described and theoretically justified? Did they relate to the original research questions? **YES** How were themes and concepts identified from the data?
- Was the analysis repeated by more than one researcher to ensure reliability? **YES – at different phases**
- Did the investigator make use of quantitative evidence to test qualitative conclusions where appropriate? **YES – reference to a separate cross-sectional component conducted by the author**
- Did the investigator give evidence of seeking out observations that might have contradicted or modified the analysis? **YES**
- Was sufficient of the original evidence presented systematically in the written account to satisfy the sceptical reader of the relation between the interpretation and the evidence (for example, were quotations numbered and sources given)? **YES**

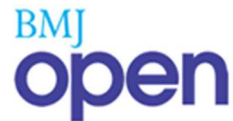

**Eliciting views on antibiotic prescribing and resistance among hospital and outpatient care physicians in Berlin, Germany: results of a qualitative study**

|                                 |                                                                                                                                                                                                                                                                                                                                                                                                                               |
|---------------------------------|-------------------------------------------------------------------------------------------------------------------------------------------------------------------------------------------------------------------------------------------------------------------------------------------------------------------------------------------------------------------------------------------------------------------------------|
| Journal:                        | <i>BMJ Open</i>                                                                                                                                                                                                                                                                                                                                                                                                               |
| Manuscript ID:                  | bmjopen-2011-000398.R1                                                                                                                                                                                                                                                                                                                                                                                                        |
| Article Type:                   | Research                                                                                                                                                                                                                                                                                                                                                                                                                      |
| Date Submitted by the Author:   | 07-Dec-2011                                                                                                                                                                                                                                                                                                                                                                                                                   |
| Complete List of Authors:       | Velasco, Edward; Robert Koch Institute , Department for Infectious Disease Epidemiology<br>Ziegelmann, Antina; Federal Ministry of Health, Division for Communicable Diseases, AIDS, Prevention of Epidemics<br>Eckmanns, Tim; Robert Koch Institute, Department for Infectious Disease Epidemiology Berlin, Germany<br>Krause, Gérard; Robert Koch Institute, Department for Infectious Disease Epidemiology Berlin, Germany |
| <b>Primary Subject Heading</b>: | Qualitative research                                                                                                                                                                                                                                                                                                                                                                                                          |
| Secondary Subject Heading:      | Infectious diseases, Epidemiology                                                                                                                                                                                                                                                                                                                                                                                             |
| Keywords:                       | antimicrobial prescribing, antibiotic resistance, inpatient care, outpatient care, social factors, focus group research                                                                                                                                                                                                                                                                                                       |
|                                 |                                                                                                                                                                                                                                                                                                                                                                                                                               |

SCHOLARONE™  
Manuscripts

only

1 Submission format for BMJ Open: Qualitative Research Article

2 **Eliciting views on antibiotic prescribing and resistance among hospital and outpatient**  
3 **care physicians in Berlin, Germany: results of a qualitative study**

4 Edward Velasco, social epidemiologist<sup>1,2</sup>; Antina Ziegelmann, microbiologist<sup>3</sup>; Tim Eckmanns,  
5 medical epidemiologist<sup>1</sup>; Gérard Krause, medical epidemiologist<sup>1</sup>

6 <sup>1</sup>Department for Infectious Disease Epidemiology, Robert Koch Institute, Berlin, Germany

7 <sup>2</sup>Faculty of Medicine, Charité - University Hospital Berlin, Germany

8 <sup>3</sup>Division for Communicable Diseases, AIDS, Prevention of Epidemics, Federal Ministry of Health,  
9 Berlin, Germany

10 Correspondence to: E Velasco, [velascoe@rki.de](mailto:velascoe@rki.de)

11 *The authors assure that all authors included on this paper fulfil the criteria of authorship. In addition*  
12 *we assure that there is no one else who fulfils the criteria but has not been included as an author.*

13 Short title: Physicians' views on antibiotic prescribing and resistance

14  
15 **ABSTRACT**

16 **Objective** To better understand physicians' views on factors of influence for the prescribing  
17 of antibiotics and on antibiotic resistance in the Berlin region, Germany

18 **Design** Qualitative study with focus groups

19 **Setting** Outpatient care and hospital care practice in the Berlin region, Germany

20 **Participants** 7 General practitioners, 2 urologists, 1 paediatrician from outpatient care; 8  
21 internists, 2 paediatricians, 2 ear, nose and throat specialists, 2 urologists from hospital care

22 **Results** Physicians showed differential interest in topics related to antibiotic prescribing and  
23 antibiotic resistance. Outpatient care physicians were interested in topics around their own  
24 prescribing, such as being able to diagnose and prescribe precisely, and topics about patient  
25 demand and noncompliance. Hospital care physicians were interested in hygiene challenges,  
26 limited consult time and multi-resistant pathogens.

27 **Conclusions** Physicians considered the development of resistance to be more in the domain  
28 of clinical treatment than that of the patient. Major challenges related to antibiotic resistance  
29 for this group of physicians are access to and clarity of treatment recommendations,  
30 implementation of hygienic measures, as well as increased outsourcing of laboratory services.  
31 Results raise questions about whether meeting physicians' expectations should be a focus  
32 when developing intervention that aims to influence antibiotic resistance in this and other  
33 areas of Germany.

34 **Keywords** antimicrobial prescribing, antibiotic resistance, inpatient care, outpatient care,  
35 social factors, focus group research

36 **Word counts** Abstract (203); Manuscript (3987)

## ARTICLE SUMMARY

### Article Focus

- Overuse of antibiotics across many specialities and in some of the most common diagnoses remains a driving force for antibiotic resistance
- While much attention has focused on limiting use and addressing clinical concerns like improving point-of-care diagnostic tests, prior literature has largely left out the consideration of socio-behavioural factors that influence physicians' decisions to prescribe antibiotics
- Focus group discussions were used to show physicians' views on factors that influence their prescribing of antibiotics and antibiotic resistance

### Key Messages

- Berlin area physicians are interested in receiving help to make informed decisions on the appropriate measures for mitigating patient discomfort and risk
- In this group, well informed prescribing practice appears to be influenced by non-patient oriented factors that are both structural (e.g. overcrowding in hospitals) as well as non-structural in nature (e.g. access to feedback from microbiologists or time allowed for patient consult)
- Physicians desire intervention activities that address their own skills, like assessment of patient needs, time management for consult and navigation of pharmaceutical consulting

### Strengths and Limitations

- Modern methodologies for focus group data analysis, including a comprehensive plan for ensuring validity in data making and data reduction were used in the study
- Presented study methodology allows replication by other research groups
- The number of participating physicians was limited, however they were recruited from diverse backgrounds with respect to age, sex, size of practice, care setting and number of years in practice

## 66 INTRODUCTION

67 Antimicrobial use has remained a major concern in medicine and epidemiology over the last  
68 years. Surveillance initiatives have been implemented in order to monitor antimicrobial  
69 consumption and usage patterns and resistance data for selected pathogens in order to present  
70 trends over time and comparisons between countries and regions.<sup>1;2</sup> The results provide  
71 evidence that antimicrobial resistance has continued to persist across all specialities and in  
72 some of the most common diagnoses. Efforts to combat resistance have focused on limiting  
73 antimicrobial use, providing patient education about appropriate use, and developing better  
74 point of care tests. There are also other socio-behavioural factors of antibiotic use and  
75 resistance, which should also be a core part of campaigns that attempt to monitor resistance in  
76 both hospital and outpatient care settings.<sup>3,4;5 6</sup>

77 In 2007 the Robert Koch Institute (RKI), the federal public health institution in Germany,  
78 initiated a number of different studies to investigate factors to be considered when designing a  
79 national strategy to prevent the spread of antimicrobial resistance. The aim was to use  
80 different methodological approaches to describe factors of influence for antibiotic prescribing  
81 and antibiotic resistance in Germany. As a preliminary study, a literature review was  
82 conducted to identify previous work on factors of influence for antimicrobial prescribing and  
83 to guide further research. The aim of this study using focus groups was to elicit physicians'  
84 views on factors that influence their prescribing of antibiotics and antibiotic resistance. As a  
85 mixed-methods research approach can help to explore research findings in greater detail,<sup>7, 8</sup> a  
86 further aim was to generate exploratory information as the basis to develop a nationally  
87 representative, cross-sectional survey on the same topic, conducted in 2008.<sup>9</sup>

88

## 89 METHODS

### 90 Focus group conceptual structure

91 A conceptual structure was created to serve as the basis for the focus group discussions. Five  
92 conceptual areas encompassed influence factors for: 1. General impressions of antibiotic  
93 resistance (e.g. How is the development of antibiotic-resistance perceived? How generally  
94 relevant is the topic of rising antibiotic-resistance?), 2. Prescribing in outpatient care (e.g.  
95 Which influence factors are relevant for prescribing antibiotics? Which factors are relevant  
96 for prescribing in outpatient care?), 3. Prescribing in hospital care (e.g. Which influence  
97 factors are relevant for prescribing antibiotics? Which factors are relevant for prescribing in  
98 hospital care?), 4. Information and knowledge about antibiotic treatment (e.g. what are  
99 sources of knowledge about antibiotics? How are physicians generally informed about  
100 medical areas related to antibiotics?) and 5. Impressions on problematic areas of concern (e.g.  
101 How are problem areas in antibiotics and antibiotic resistance addressed? Which factors  
102 should be addressed by potential interventions to combat antibiotic resistance?).

### 103 Focus group participants

104 We recruited physicians from the Berlin region, Germany, with diverse backgrounds with  
105 respect to age, sex, specialty, practice type, the number of patients seen quarterly, and location  
106 of practice. Physicians were offered monetary compensation of 200 Euros. We conducted four  
107 focus group sessions of 5-7 physicians each: 1. Outpatient setting, less experience; 2.  
108 Outpatient setting, more experience; and 3. Hospital setting, less experience; 4. Hospital  
109 setting, more experience (Table 1 and 2). A qualitative research agency (H,T,P, Concept<sup>10</sup>)  
110 was employed to draw a sample of physicians, moderate and transcribe the group discussion  
111 sessions.

### 112 Interview methodology

113 The focus groups were held between December 4 and 6, 2007 in Berlin, and were facilitated  
114 in 4 sessions of 2 hours each. All sessions were held separately and conducted by a trained  
115 moderator. Moderators used a semi-structured framework, a method which has been found to  
116 enable participants to share and confirm their views, or construct new views based on  
117 interactions in a peer context, and build knowledge together.<sup>11, 12</sup> For each discussion, the  
118 framework was based on the topics from the five conceptual areas, but allowed participants in  
119 each group to explore topics differentially. Interviews were transcribed in real-time, and each  
120 session was video-recorded for later in-depth review. To check for accuracy of the text in



1  
2  
3 121 each transcription, 6 random samples of 5-7 minutes were chosen from the video-footage of  
4 122 each focus group, and then checked against the corresponding text. Video footage was also  
5 123 later reviewed in greater detail in order to explore group dynamics.

## 124 **Data Analysis**

10 125 A semi-quantitative approach was used to analyse the results of the focus group discussions.  
11 126 This firstly consisted of examining the data based on the five conceptual areas and the  
12 127 respective study questions. We were able to draw key relationships between conceptual areas,  
13 128 so called “code-categories” under which were assigned individual topics arising from the  
14 129 content of the focus group discussions. The resulting framework was used to guide all  
15 130 subsequent data-making and analysis tasks.

20 131 A pre-analysis code map was developed from the framework, showing a hierarchy from the  
21 132 five code-categories to each topic and sub-topic. (Supplementary data table.) The code map  
22 133 was then created, to be used later for constant comparative analysis—an iterative method of  
23 134 content analysis where each category is searched and constantly revised, popularly used to  
24 135 allow so called “emergent codes” to be applied at all points in the analysis.<sup>13;14</sup> Before  
25 136 beginning the analysis, we validated our code map by performing a code check, looking for  
26 137 duplicates and comparing codes to the topics within the aforementioned framework.

27 138 Revisions were made and a resulting code map was used for subsequent data making (Figure  
28 139 1).

29 140 All text from transcripts was subjected to constant comparative analysis, and the frequencies  
30 141 of codes were used as a measure of significance. All data making and content analyses were  
31 142 done using TAMS Analyzer for Macintosh OS X (version 4.13), an open-source, computer-  
32 143 assisted qualitative research tool.<sup>15</sup>

33 144 We extracted quotes from all transcripts when a specific topic involved multiple sentences,  
34 145 when the comment provided was observed to be provocative and/or when it generated lively  
35 146 discussion among more than 2 individuals. We extracted relevant quotes from each focus  
36 147 group interview in order to further establish an in-depth look at each topic. An epidemiologist  
37 148 who is fluent in German and a native English speaker completed German-English  
38 149 translations. We assigned each participant a quote-identifier based on the focus group in  
39 150 which they belonged and their demographic information (Shown in Table 1 and 2). The  
40 151 identifier is presented in the results section as a two numbers (focus group number - ID  
41 152 number).

## 153 RESULTS

154 Table 3 provides a detailed overview of the highest incident emergent codes and code-  
155 categories from constant comparison analysis for all focus groups combined. Emergent codes  
156 served as a way to begin further critical analysis of the main insights reflected in this group of  
157 physicians, which we present in the following segments stratified by each focus group.  
158 Additional in depth-responses on several determinants of antibiotic prescribing and antibiotic  
159 resistance that cut across all focus groups, such as non-patient factors, hygiene, the  
160 pharmaceutical industry and antibiotic costs are also presented (Table 4).

### 161 Focus Group 1: Outpatient care physicians with fewer years of practice experience

162 Physicians focused on themes that are related to prescribing in the outpatient care setting  
163 (frequency: 146). Discussion focused on general impressions of rising resistance (115),  
164 sources of information on antibiotics (64), and physician-oriented interventions (17). They  
165 expressed concern about difficulties dealing with complicated patient histories (12), patient  
166 compliance (9) and patient perception of treatment (8). Participants frequently discussed the  
167 development of antibiotic substances (11) and about responsibility in their own practice (4).  
168 Participants also focused on specific diagnoses that are perceived to be driving resistance,  
169 with major discussion occurring around the topic of uncomplicated urinary tract infections  
170 (UTIs) (5). Cost was also discussed as a factor influencing antimicrobial prescribing,  
171 specifically, the effects of health regulations on the accessibility of medications.

172 Conferences (9) and pharmaceutical companies (4) were discussed most when it came to  
173 common sources of information on antibiotics. A large amount of time was spent discussing  
174 pharmaceutical representatives, who participants found to be persistent and aggressive:

175 ‘They come often and always have antibiotics on hand. You get a bag of them every  
176 day. And high doses of drugs. It all stacks up in the cabinet. For me there are 4 to 5  
177 representatives each day’ (*Participant 1-3: Table 1-2*).

178 ‘I notice that they approach me, too. But I do not accept them all. I would estimate that  
179 there are about 5-7 every day, and they do bring whole bags full (of giveaways).’ (1-2)

180 ‘The representatives come into my practice. And you do listen to them. You even take  
181 the information they offer, even if with a critical eye. But you do learn something as  
182 well.’ (1-5)

183 ‘The pharmaceutical industry is very aggressive.’ (1-3)

1  
2  
3 184 'For urology I cannot remember in recent months receiving a visit on this issue. But that  
4  
5 185 is certainly very different than in the primary care sector.' (1-4)

6  
7 186 There was no single participant dominating the discussion, and comments readily came from  
8  
9 187 each; however, the paediatrician did mention that there is less pharmaceutical presence in her  
10 188 practice. This group most frequently saw feedback on their resistance situation and  
11  
12 189 cooperation with laboratories (5) as ways to address the problem of rising antibiotic  
13  
14 190 resistance.

15  
16 191 Focus Group 2: Outpatient care physicians with more years of practice experience

17  
18 192 Unlike the first outpatient group, this group veered away from a dominant focus on  
19  
20 193 outpatient-specific topics and discussed most frequently those topics within the category of  
21  
22 194 general impressions on rising resistance (150). The group was also concerned with having  
23  
24 195 adequate sources of information on antibiotics (126), outpatient-specific influences on  
25  
26 196 prescribing (105) and other physician-oriented interventions (28).

27  
28 197 Physicians frequently discussed the effectiveness of antibiotic substances and drug  
29  
30 198 development (6). As in the previous outpatient care group; cost was seen as a factor of  
31  
32 199 influence on antimicrobial prescribing. In this group, participants agreed that they are less  
33  
34 200 wary of the cost of antibiotics because the nature of predominantly short treatments makes it  
35  
36 201 affordable, compared with longer-term treatments, like those prescribed for high blood  
37  
38 202 pressure. This group also talked about social factors that may be driving the situation, like  
39  
40 203 increased foreign travel (6), over-the-counter availability of drugs abroad (4), and migration  
41  
42 204 (4). The topic of UTIs arose as a specific concern driving resistance.

43  
44 205 This group discussed the category of hospital-specific influences on prescribing (8), like  
45  
46 206 multi-resistant pathogens (6). The topic of hospital hygiene arose in each of the two outpatient  
47  
48 207 focus groups, which agreed that antibiotic resistance was largely a problem of the hospital  
49  
50 208 setting, "In hospitals resistance plays a bigger role because there one finds hospital specific  
51  
52 209 germs." (1-4) Incidentally, the topic of resistance was often quickly averted when brought up,  
53  
54 210 instead being commented as a problem specific to the hospital care setting:

55  
56 211 'I think the development of resistance is more the domain of clinical treatment  
57  
58 212 and not the patient.' (2-5)

59  
60 213 'Exactly.' (2-3)

214 'Yeah, especially in intensive care.' (2-4)

215 Participants discussed most frequently that patient demand (11) is a major driver for  
216 prescribing in the outpatient setting, followed by doctor experience (9) and specific diagnoses

1  
2  
3 217 (6). The role of the patient, including patient non-compliance and self-medication also  
4  
5 218 emerged. Physicians discussed two types of patients: those concerned with getting an  
6  
7 219 antibiotic, and those concerned with avoiding what they think is harmful:

8  
9 220 'Pressure from patients is not insignificant...the worst are the mothers where the  
10 221 children are really very sick and the mothers say: I don't want any chemotherapy.  
11 222 The lymph nodes are thick with pus, almost hanging out, and then the mother says  
12 223 no, no antibiotics for us. That's bad.' (2-1)

13  
14 224 Physicians in this group valued information that is concise and available to them in a way that  
15  
16 225 complements their work without taking up too much time:

17  
18 226 'Is there a new antibiotic? What is the resistance situation? Which organisms are  
19 227 being affected? What are the indications, what are the side effects? The  
20 228 interactions with other drugs? Are there alternatives? If this information could be  
21 229 given to us in a short and sweet way, then we would be happy. Something like  
22 230 this is not currently available to us.' (2-1)

23  
24 231 Participants in focus group 2 found treatment guidelines (8), pharmaceutical based materials  
25  
26 232 (5) and conferences (4) to be main sources of information on antibiotics. This group found  
27  
28 233 information from pharmaceuticals to be concise and readily available:

29  
30 234 'There's been a big change from the expertise of representatives who come in.  
31 235 These are all clinicians and they do not give a bad impression at all. They bring  
32 236 me a lot of information although, of course, you have to make sense of it all. But I  
33 237 do admit that I feel as though I am getting good consulting. Because I don't have  
34 238 the time to do my own research nor to sit down on the Internet every evening. I  
35 239 am very grateful for the very specific information they offer me.' (2-2)

36  
37 240 As evidenced above, most other comments about the pharmaceutical industry also remained  
38  
39 241 positive in this group. There were comments that patient outreach is not needed in Germany  
40  
41 242 (2), and this focused largely on the belief that the patient population is well informed and, if at  
42  
43 243 all, opposed to antibiotics, sometimes opting for alternative therapies.

44  
45 244 They discussed the need to have more access to surveillance of their local resistance situation:  
46  
47 245 "I think we need what there was in (the former) East Germany, a short, independent  
48  
49 246 information sheet that shows the current epidemiological situation in the country or the region  
50  
51 247 where I live." (2-5) The group seems to have agreed, since they mostly discussed interest the  
52  
53 248 following intervention options: increased surveillance (9), including information on their  
54  
55 249 regional resistance situation (5), constraints on their patient-consult time (3), and consulting  
56  
57 250 (2).

58  
59  
60 251

252

### 253 Focus Group 3: Hospital physicians with fewer years of experience

254 Physicians most frequently discussed their general impressions on rising resistance (70),  
255 hospital-specific influences on prescribing (40), sources of information on antibiotics (15),  
256 and physician-oriented interventions (12). Patient non-compliance (8), correct prescribing and  
257 antibiotic dosing (5), hospital care (3) and hygiene (3) were the most frequently addressed  
258 topics.

259 The Internet (3), pharmaceutical advertising (2) and conferences (2) were listed as the most  
260 frequent physician-oriented interventions mentioned by this group. The visibility of  
261 pharmaceutical advertising was also discussed, and this group found it easy to access and  
262 useful for learning. Participants were in agreement about how pharmaceutical advertising is  
263 more accessible than other traditional forms of information dissemination, such as medical  
264 journals.

265 Participants overwhelmingly stayed with the topic of hospital workplace concerns, like  
266 hygiene (7) and time for patient-consult (4) as the most needed intervention to combat  
267 resistance in their setting. They discussed non-structural demands on the hospital, such as  
268 advances in treatment possibilities for more complex indications, which might necessitate  
269 more antibiotics consumption in the hospital setting, which may in turn itself be a driver for  
270 resistance.

271 The hospital itself was viewed as having structural aspects that might contribute to increased  
272 antibiotic use and resistance (7). One such aspect, maintaining hygiene, was a perceived  
273 danger of interrelated issues of increased patient load (3), patient-patient contact (1) and  
274 infectiousness (2). One physician noted that the pressure to treat more patients has led to a  
275 related need for a faster consult time, which may put strain on the thoroughness of hospital  
276 hygiene measures. Hospital physicians also pointed out that they would prefer to pursue  
277 intervention through new programs for hygiene, although they also recognise it to be a  
278 challenging method of improvement. Participants also discussed the benefits of transparency  
279 and feedback on antibiotic consumption, costs and trends in the hospital setting.

### 280 Focus Group 4: Hospital physicians with more years of experience

281 Participants discussed most frequently about their general impressions on rising resistance  
282 (66), followed by hospital-specific influences on prescribing (29), sources of information on

1  
2  
3 283 antibiotics (27), and physician-oriented interventions (21). The most frequent topics brought  
4 284 up by this group were diagnostics possibilities (5), patient history/epidemiology (increasingly  
5 285 acute cases in care) (4) and social factors like aging (4). When talking about the influence on  
6  
7 286 prescribing in hospital care, the following topics were most frequent: indication and disease  
8  
9 287 (2), risk assessment in acute cases (2), specificity of guidelines (2) and time constraints during  
10  
11 288 patient consultation (2). This group of physicians made relatively long commentaries at a  
12  
13 289 higher level of detail than was observed in participants during the other focus group sessions.  
14  
15 290 The group spoke at such detail about non-patient factors of antibiotic prescribing and  
16  
17 291 antibiotic resistance, including patient stays in non-intensive wards of hospitals as increasing  
18  
19 292 risk, minimised hygiene routines in hospital due to increased patient intake.  
20  
21 293 Physicians frequently consulted specialty journals (9), clinical handbooks (3) and the Internet  
22  
23 294 (3) as sources of information on antibiotics. Discussion points on hospital feedback on the  
24  
25 295 resistance situation (5) and continuing education (2), especially in the area of hygiene (2) and  
26  
27 296 infectious diseases (2) emerged most frequently in discussions regarding intervention for  
28  
29 297 antibiotic resistance.

29  
30 298 Collegial exchange with microbiologists/ laboratories (5) emerged as the most frequent topic  
31  
32 299 under the category of hospital-specific influences on prescribing, something that was also  
33  
34 300 observed in focus group 3. Physicians in this group spoke about opportunities to closely  
35  
36 301 collaborate with laboratories and microbiologists, which they saw as helpful in navigating  
37  
38 302 antibiotic treatments:

38  
39 303 The microbiologists that we have are top. We mostly get reports via the doctor  
40  
41 304 calling us before anything is published on our intranet. It is then also discussed,  
42  
43 305 what underlying disease does the patient have, which antibiotic was given, and the  
44  
45 306 provisional findings will be communicated first. Short, quick ways; you have to  
46  
47 307 communicate well with people. (4-1)

44  
45 308 The topic of outsourcing of laboratories arose throughout this discussion. Physicians  
46  
47 309 perceived this as prohibiting close communication and producing too much bureaucracy, “For  
48  
49 310 us, it is unfortunately not the case. The laboratory has been outsourced. A service provider is  
50  
51 311 at the other end of town; they can't communicate with us much.” (4-5) Other emerging themes  
52  
53 312 were the role of the hospital pharmacist in influencing prescribing choices (4), followed by  
54  
55 313 how often and appropriately internal/hospital antibiotic treatment guidelines are updated (4),  
56  
57 314 and subsequently by multi-resistant pathogens (3).

56  
57 315



316 **DISCUSSION**

317 Past research has underlined the importance of patient-oriented factors of influence for  
318 prescribing and the focus has primarily been on patient demand and noncompliance.<sup>16-18</sup> This  
319 is consistent with the historical data on the subject showing that antibiotics are more likely to  
320 be prescribed when the patient expects them, and that they may be even more likely to be  
321 prescribed when the doctor may perceive that the patient wants a prescription, when in fact  
322 the demands of patient are unclear.<sup>19</sup> Responses from physicians in these groups indicated  
323 something different: an overwhelming interest in non-patient factors that influence antibiotic  
324 prescribing and resistance.

325 A major topic in both groups of participating physicians from outpatient care was their  
326 experience of increasingly difficult diagnoses that are complicated by resistance patterns. A  
327 good example is the increasing prevalence of antibiotic resistant UTIs. Many participants are  
328 involved in the management of UTIs, a finding supported by the cross-sectional study  
329 component of this research (survey).<sup>9</sup> Indeed, the trends in many European studies of  
330 antimicrobial resistance show UTIs to be accountable for a large amount of antibiotics  
331 consumption.<sup>1</sup> Many of the common pathogens leading to UTIs such as *E. coli*, *P. mirabilis*  
332 and *K. pneumoniae* are increasingly becoming resistant to standard treatments, which affects  
333 antibiotic treatment choices;<sup>20;21</sup> however, physicians showed differential interest topics  
334 related to their antibiotics prescribing and resistance, based on their care setting.

335 Outpatient care physicians found resistance primarily a problem of the hospital care setting,  
336 related to the presence of different multi-resistant pathogens and challenges with hygiene.  
337 This was also a major topic discussed by hospital physicians. The increasing prevalence of  
338 multi-resistant pathogens is of particular concern, especially given the views that the hospital  
339 ward is increasingly faced with more patients at any single time, and that patients—many of  
340 whom are carrying more complex indications—are also seen during shorter consult times.<sup>22;23</sup>

341 In fact, data from the survey identified that status as a hospital physician was a predictor for  
342 deciding to start antimicrobial therapy on a patient.<sup>9</sup> This could be attributed to the fact that,  
343 generally, hospital physicians attend more acute cases than their outpatient care counterparts.

344 Hospital care physicians were accustomed to regular and easy collaboration with  
345 microbiologists when discussing indications and possibilities for therapy. This was also found  
346 in the study sample of the survey, which showed that hospital physicians found it either  
347 important or very important that they receive data on regional antimicrobial resistance and  
348 appropriate feedback for prescribing.<sup>9</sup> This opinion was also shared in the focus group

1  
2  
3 349 discussions among physicians who want laboratories to provide feedback on the resistance  
4 350 situation for their hospitals. Participants expressed frustration and concern around outsourcing  
5 351 of laboratories. It was not only a matter of having less contact with helpful microbiologists,  
6 352 but also a described a need: that even in a hospital setting with outsourced laboratory services,  
7 353 it is important to offer chances to dialog with microbiologists. While this finding does seem to  
8 354 match the views shown by the national survey, more qualitative research on other groups  
9 355 could help to show whether or not there is a need to enhance access to their local resistance  
10 356 situation in the hospital setting in other areas of Germany.

11 357 There was differential discussion about treatment guidelines, which may also be an important  
12 358 influence factor on physician prescribing practice. Participants from the outpatient care setting  
13 359 found clinical recommendations to be difficult to access quickly and use. For the hospital  
14 360 setting, this was significantly different. There was more discussion about whether guidelines  
15 361 are up-to-date, and about their relevance, specificity and availability in clinical practice. There  
16 362 are many guidelines with varying degrees of quality available to physicians. Hospital care  
17 363 physicians have an array of in-house developed guidelines, differentially taking into account  
18 364 local resistance data.<sup>24</sup> But, as also evidenced by other studies, availability is differential and  
19 365 may warrant addressing this separately for each practice setting.<sup>4,25;26</sup>

20 366 The pharmaceutical industry was often a major topic of discussion, but it remains unclear how  
21 367 large the current influence of the pharmaceutical industry is on physicians in Germany.  
22 368 Physicians indicated that the pharmaceutical industry plays a large role in outpatient care  
23 369 practice. Visits to doctors' offices by the industry and free samples of antibiotics are  
24 370 ubiquitous; their informational materials are generally perceived as attractive. This may have  
25 371 to do with the fact that information from the industry presents information in ways that are  
26 372 more convenient than scientific literature on the same topics.<sup>27</sup> These important findings  
27 373 about the presence of the pharmaceutical industry also showed up among the participants of  
28 374 the survey: despite some caution about the persistence of the industry, most outpatient care  
29 375 physicians welcome their assistance, and view them as another resource among many other  
30 376 sources of information on antibiotics. Results from these focus groups and the survey indicate  
31 377 that the pharmaceutical industry has a large presence among physicians in Germany.

32  
33  
34  
35  
36  
37  
38  
39  
40  
41  
42  
43  
44  
45  
46  
47  
48  
49  
50  
51  
52  
53  
54  
55  
56  
57  
58  
59  
60

378

379 **CONCLUSION**

380 Our findings show that outpatient care physicians in Berlin are interested in topics around  
381 their own prescribing, like physician-sensitivity to patient need, time management for patient  
382 consult, access to guidelines and their perception of the pharmaceutical industry. These non-  
383 patient determinants, when coupled with intervention ideas for the hospital care setting (e.g.  
384 improving hygiene measures, easing diagnostics and cooperation with laboratories) are  
385 different from factors of antibiotic prescribing and resistance that have been previously  
386 observed in similar contexts: they are physician-oriented. Furthermore, focus group  
387 discussions provided more details about some of the determinants that were also found  
388 relevant by physicians participating in the survey component of this research. Together these  
389 study components raise questions about whether targeting other physicians may be a better  
390 approach for intervention that aims to influence antibiotic resistance in this and other areas of  
391 Germany. This could be a remarkable finding for Germany: in other countries intervention to  
392 reduce antimicrobial resistance has often been targeted at the patient directly, but more  
393 qualitative research and similar focus groups in other areas of Germany could show whether  
394 or not this trend is nationally relevant.

395

## 396 **STUDY LIMITATIONS**

397 Participants were all from the Berlin region, and included physicians from diverse  
398 backgrounds with respect to age, sex, size of practice, care setting and number of years in  
399 practice. Additionally, we recruited physicians from the former east and west areas of Berlin,  
400 and from outer city areas to reflect greater diversity specific to this setting in Germany. We  
401 used a relatively small, purposive, convenience sample of physicians from specialties known  
402 to prescribe most often, thus there may have been some degree of representational bias.  
403 Although many findings from the focus groups align well with findings from our nationally  
404 representative, survey, which was conducted to further explore influence factors on this topic,  
405 other focus groups in other regions or large metropolitan areas in Germany could strengthen  
406 these results and are critical before determining national relevance.

407 The same moderator conducted all focus group discussions based on a conceptual framework  
408 drawn before the sessions, so there could be issues of reliability due to its application to 4  
409 different groups of physicians. But, since we intended for the moderator to allow for  
410 participants in each group to explore topics differentially around this framework, so that any  
411 new or previously unanticipated topics could come up, we believe that this provided a  
412 strength that is unique to this qualitative approach.

413

1  
2  
3  
4  
5  
6  
7  
8  
9  
10  
11  
12  
13  
14  
15  
16  
17  
18  
19  
20  
21  
22  
23  
24  
25  
26  
27  
28  
29  
30  
31  
32  
33  
34  
35  
36  
37  
38  
39  
40  
41  
42  
43  
44  
45  
46  
47  
48  
49  
50  
51  
52  
53  
54  
55  
56  
57  
58  
59  
60

414 **Acknowledgements** We thank the following individuals for cooperating on this research  
415 effort: Werner Espelage, Kirsten Heckenbach, Jürgen Hoffmann, Michael Kramer and Ines  
416 Noll.

417 **Funding** This research was funded by a departmental grant from the Federal Ministry of  
418 Health. The study sponsors had no role in the study design or in the collection, analysis, and  
419 interpretation of data, in the writing of the report, nor in the decision to submit the article for  
420 publication.

421 **Competing interests** None

422 **Ethical approval** This study was approved by the institutional commission for data  
423 protection of the Robert Koch Institute. All participants gave informed consent before taking  
424 part in focus group discussions.

425 **Data access** all authors had full access to all of the data (including statistical reports and  
426 tables) in the study and can take responsibility for the integrity of the data and the accuracy of  
427 the data analysis.

428 **Contributors** EV completed all analysis and drafted the manuscript. AZ, TE and GK  
429 conceived of the study and obtained funding. All authors contributed to the study design, the  
430 carrying out of the study, and provided critical feedback to the manuscript.

431 **Provenance and peer review** Not commissioned; externally peer reviewed.

432 **Data sharing statement** No additional data available.

433

1  
2  
3 434 | [Figure 1 Plan for data-making, data reduction and analysis]  
4 435  
5  
6  
7  
8  
9  
10  
11  
12  
13  
14  
15  
16  
17  
18  
19  
20  
21  
22  
23  
24  
25  
26  
27  
28  
29  
30  
31  
32  
33  
34  
35  
36  
37  
38  
39  
40  
41  
42  
43  
44  
45  
46  
47  
48  
49  
50  
51  
52  
53  
54  
55  
56  
57  
58  
59  
60

For peer review only



436 **Table 1 Focus group participant details: outpatient care**

| Focus Group | Participant ID | Sex | Age | Specialty   | Practice type | Years in Practice | Location | Patients per quarter |
|-------------|----------------|-----|-----|-------------|---------------|-------------------|----------|----------------------|
| 1           | 1              | F   | 46  | Paediatrics | Group         | 12                | East     | ~ 900                |
|             | 2              | F   | 35  | GP          | Group         | 5                 | West     | ~ 200                |
|             | 3              | M   | 48  | GP          | Single        | 9                 | East     | ~ 1000               |
|             | 4              | M   | 54  | Urology     | Single        | 11                | West     | ~ 1200               |
|             | 5              | M   | 40  | GP          | Group         | 10                | West     | ~ 800                |
| 2           | 3              | F   | 55  | GP          | Group         | 16                | East     | ~ 150                |
|             | 4              | F   | 42  | GP          | Group         | 15                | East     | ~ 180                |
|             | 2              | F   | 53  | Urology     | Group         | 15                | West     | ~ 800-900            |
|             | 1              | M   | 62  | GP          | Group         | 25                | West     | ~ 2000               |
|             | 5              | M   | 57  | GP          | Single        | 15                | East     | ~ 800-900            |

437

438

439 **Table 2 Focus group participant details: hospital care**

| Focus Group | Participant ID | Sex | Age | Specialty/ Position     | Number of beds | Years in Practice | Location | Patients per quarter |
|-------------|----------------|-----|-----|-------------------------|----------------|-------------------|----------|----------------------|
| 3           | 1              | F   | 40  | Paediatrics/Consultant  | 1200           | 8                 | West     | ~ 600-700            |
|             | 2              | M   | 34  | Internal/Resident       | 620            | 5                 | West     | ~ 400                |
|             | 3              | M   | 43  | Internal/ Consultant    | 538            | 9                 | East     | ~ 500                |
|             | 4              | M   | 42  | Internal/ Resident      | 626            | 4                 | West     | ~ 300-400            |
|             | 5              | F   | 34  | Internal/ Resident      | 363            | 3.5               | West     | ~ 400                |
|             | 6              | M   | 30  | ENT/ Resident           | 1200           | 3                 | East     | ~ 350                |
|             | 7              | M   | 43  | Urology/ Consultant     | 220            | 12                | West     | ~ 500                |
| 4           | 1              | M   | 51  | Internal/ Consultant    | 538            | 16                | West     | ~ 500                |
|             | 2              | F   | 40  | Internal/ Consultant    | 1200           | 14                | East     | ~ 1000               |
|             | 3              | M   | 56  | Internal/ Consultant    | 276            | 31                | West     | ~ 500                |
|             | 4              | M   | 48  | ENT/Consultant          | 1000           | 10                | West     | ~ 1400               |
|             | 5              | M   | 41  | Internal/ Consultant    | 1200           | 10                | West     | ~ 1000               |
|             | 6              | M   | 44  | Paediatrics/ Consultant | 542            | 16                | West     | ~ 300-500            |
|             | 7              | F   | 63  | Urology/ Consultant     | 1200           | 37                | East     | ~ 4000               |

440

441

442 **Table 3 Top 5 highest incident emergent codes and categories from constant comparison**  
 443 **analysis (All groups combined; total codes n=1035)**  
 444

| Code-Category                                 | 5 most frequent code-topics                  | Frequency |
|-----------------------------------------------|----------------------------------------------|-----------|
| General impressions on rising resistance      |                                              | 401       |
|                                               | Patient noncompliance                        | 15        |
|                                               | Antibiotics development                      | 13        |
|                                               | Hospital specific issues, e.g. hygiene, labs | 11        |
|                                               | Antibiotic dosing                            | 10        |
|                                               | Urinary tract infections                     | 10        |
| Outpatient-specific influences on prescribing |                                              | 251       |
|                                               | Patient history                              | 18        |
|                                               | Patient demand                               | 18        |
|                                               | Physician experience                         | 14        |
|                                               | Patient self-educated                        | 11        |
|                                               | Patient compliance                           | 11        |
| Sources of information on antibiotics         |                                              | 234       |
|                                               | Practice guidelines                          | 10        |
|                                               | Continuing medical education                 | 8         |
|                                               | Specialty journals                           | 8         |
|                                               | Internet                                     | 8         |
|                                               | Quality of conferences                       | 7         |
| Physician-oriented interventions              |                                              | 84        |
|                                               | Surveillance                                 | 9         |
|                                               | Laboratory feedback                          | 7         |
|                                               | Information on local resistance situation    | 7         |
|                                               | Hospital                                     | 4         |
|                                               | Hygiene                                      | 4         |
| Hospital-specific influences on prescribing   |                                              | 65        |
|                                               | Up-to-date internal guidelines               | 4         |
|                                               | Laboratory/microbiologists exchange          | 4         |
|                                               | Specificity of Internal guidelines           | 4         |
|                                               | Experience with infectious diseases          | 3         |
|                                               | Problematic diagnoses                        | 3         |

445 |  
 446

447 **Table 4 Selected in depth-responses from focus group discussions**  
448

| Category                       | Quotes                                                                                                                                                                                                                                                                                                                                                                                                                                                                                                                                                                                                                                                                                                                                                                                                                                                                                                                                                                                                                                                                                                                                                                                                                                                                                                                                                                                                                                                                                                                                                                                      |
|--------------------------------|---------------------------------------------------------------------------------------------------------------------------------------------------------------------------------------------------------------------------------------------------------------------------------------------------------------------------------------------------------------------------------------------------------------------------------------------------------------------------------------------------------------------------------------------------------------------------------------------------------------------------------------------------------------------------------------------------------------------------------------------------------------------------------------------------------------------------------------------------------------------------------------------------------------------------------------------------------------------------------------------------------------------------------------------------------------------------------------------------------------------------------------------------------------------------------------------------------------------------------------------------------------------------------------------------------------------------------------------------------------------------------------------------------------------------------------------------------------------------------------------------------------------------------------------------------------------------------------------|
| Hygiene                        | <p>'Have a look what is happening in the operating rooms. Time for cleaning up is getting shorter every day. Before we had around 100 beds in a normal ward, now its cut down to 40-50 beds, but we are still treating as many patients as they were 10 years ago. Get in and get out. A bed is never empty. And I have my doubts as to whether these disinfectant wipes are an ideal solution. I think the time pressure is there already a problem.' (4-7)</p> <p>'The highest infection rates are in intensive care units, but it is certainly always clean. In the OR smears are made at regular intervals. I think this is still the safest. Unless they have very septic cases and those cases where the pus runs from the abdomen. On the hospital ward that is where I think it is not very hygienic. In intensive care so they can get almost all antibiotics, and that is where the transmission of nosocomial infections at the highest, and where there are more immunosuppressed patients.' (4-1)</p> <p>'From our end in the clinic, it is the hospital-acquired infections that are acquired in the hospital and last for 2-3 days, possibly even later. They are often preventable through effective hygiene measures and can be much better than they would be with antibiotics.' (4-3)</p>                                                                                                                                                                                                                                                                                |
| Laboratory and resistance data | <p>'Our laboratory is outsourced, but once we had also invited a microbiologist to provide training, and he made a comparison of the germs in hospital with those generally presented in the other hospitals. It was good information.' (4-3)</p> <p>'Many things change as well over the years, procedures change. Too often, there is a deficit in this information.' (4-3)</p> <p>'Guidelines vary and are specific to each hospital. We have a very committed leader in this area, who takes a lot of trouble to log and actually follow information from each recommending commission, which often revise their information. We have a commission that discusses and revises information which is then put online for reference and so that all staff can gain insight. We also have disclosure on which department prescribe show much and how expensive it is. This is useful in individual cases, and to follow the development of resistance and hygiene. So, it is all kept very transparent.' (3-3)</p>                                                                                                                                                                                                                                                                                                                                                                                                                                                                                                                                                                          |
| Pharmaceutical industry        | <p>'Pharmaceutical advertising is very important. There are at least two variants. There are those that visually present with more or less exciting images and colours. And these accordingly make you curious so that you might read some fine print and look more closely to find out what the stuff is. I find this to be the more pleasant variant. Because you immediately recognize it as such and may or may have to look closer. Medical journals on the other hand may contain interesting content, but there it's hard for you to determine what the content is. Is it a short conference report? Is it a topic that interests me? A professor on a topic I am interested in? Is it really is objective? And that's the annoying thing, because then it is difficult to distinguish.' (3-7)</p> <p>'They also know as who is receptive. Then they just leave the bag there and just want a signature and a seal. Much is given at each and every day, many just want a short word. I've been doing this at the counter. Very rarely do I give them an appointment. For me there are 4 to 5 representatives each day.' (1-1)</p> <p>'Pharmaceutical representatives give me bags full (of antibiotic samples)!' (1-P1)</p> <p>'In the moment when the pressure in the outpatient setting is relatively high, even from marketing, then certain things are pushed. Something has changed in prescribing in the outpatient setting; this is what will notice from practice in the clinic. Prescribing practice, what is the underlying it, this is often not transparent.' (4-6)</p> |
| Cost                           | <p>'Until three years ago, I was still prescribing Cotrim in the urology setting. It was still cheap, at about €3. Back then, gyrase-inhibitors had a starting price of about 12 €. Then health regulations led to compulsory levies, which introduced a fixed fee of 8€. Since then, Cotrim increased from 3€ to 12€ -- the same as the gyrase-inhibitors. Until then, the threshold for prescribing gyrase-inhibitors for UTIs was relatively high, and I preferred to prescribe Cotrim. But since the price drop, I prescribe Cotrim less and more quickly look to prescribing gyrase-inhibitors.' (1-4)</p> <p>'Yes, I would think that costs are different for antibiotics than for other treatments. Simply because the duration of (antibiotic) treatment is short. When I prescribe an antibiotic, and even if it is an expensive one, then I know it takes 10 days or 2 weeks, so the treatment is limited from the outset. When I prescribe someone a drug for its high blood pressure, which in the quarter costs 150€, then I am affected each quarter. Thus, the antibiotics - treatment when it comes to price, is certainly not as problematic as the high blood pressure treatment or other therapies I am prescribing.' (2-1)</p>                                                                                                                                                                                                                                                                                                                                          |
| Other non-patient determinants | <p>'We have experienced changes: like short stays in hospital. Hospitals are simply the most dangerous places for patients. The sooner the patient is out of the hospital the better. The more minimal invasive interventions are, the lower the probability for wound infections.' (FG3-P7)</p> <p>'Recent more complex and daring; cardio-haematology, oncology. We are also treating acute myelogenous leukaemia, which accounts for a lot of consumption of antibiotics. You also can't ignore that in certain areas treatments are simply too complex. The result is also that inappropriate consumption is higher. This is the price for medical progress. Bypasses for 80 year olds, do an ACVB and then they still catch pneumonia, lie for weeks in intensive care. This is the reality now. We believe in all sorts of advances; but we'll see the resulting effects soon enough.' (4-1)</p>                                                                                                                                                                                                                                                                                                                                                                                                                                                                                                                                                                                                                                                                                      |

449

450

## Reference List

- 1  
2  
3 451  
4 452  
5 453 (1) Ferech M, Coenen S, Malhotra-Kumar S, Dvorakova K, Hendrickx E, Suetens C et al.  
6 454 European Surveillance of Antimicrobial Consumption (ESAC): outpatient antibiotic  
7 455 use in Europe. *J Antimicrob Chemother* 2006; 58(2): 401-407.
- 8  
9 456 (2) Vander Stichele RH, Elseviers MM, Ferech M, Blot S, Goossens H. Hospital  
10 457 consumption of antibiotics in 15 European countries: results of the ESAC  
11 458 Retrospective Data Collection (1997-2002). *J Antimicrob Chemother* 2006;  
12 459 58(1):159-167.
- 13  
14 460 (3) Cotter M, Daly L. Antibiotic prescription practices of general practitioners. *Ir Med J*  
15 461 2007; 100(9):598-601.
- 16  
17 462 (4) Guerra CM, Pereira CA, Neves Neto AR, Cardo DM, Correa L. Physicians'  
18 463 perceptions, beliefs, attitudes, and knowledge concerning antimicrobial resistance in a  
19 464 Brazilian teaching hospital. *Infect Control Hosp Epidemiol* 2007; 28(12):1411-1414.
- 20  
21 465 (5) Hulscher MEJL, Grol RPTM, Van der Meer JWM. Antibiotic prescribing in hospitals:  
22 466 a social and behavioural scientific approach. *Lancet Infectious Diseases*  
23 467 2010;(10):167-175.
- 24  
25 468 (6) Harbarth S, Monnet DL. Cultural and socioeconomic determinants of antibiotic use.  
26 469 In: Gould IM, van der Meer J, editors. *Antibiotic Policies - Fighting Resistance*.  
27 470 Berlin: Springer; 2007. 29-40.
- 28  
29 471 (7) O'Donnel A, Luftey K, Marceau L, McKinlay J. Using focus groups to improve the  
30 472 validity of cross-national survey research: A study of physician decision making. *Qual*  
31 473 *Manag Health Care* 2007;(17):971.
- 32  
33 474 (8) Kuper A, reeves S, Levinson W. An introduction to reading and appraising qualitative  
34 475 research. *BMJ* 2008; 337(10):288.
- 35  
36 476 (9) Velasco E, Espelage W, Faber M, Noll I, Ziegelmann A, Krause G et al. A national  
37 477 cross-sectional study on socio-behavioural factors that influence physicians' decisions  
38 478 to begin antimicrobial therapy. *Infection* 2011.
- 39  
40 479 (10) H,T,P, Concept website: <http://www.inspirationformarketing.com/>
- 41  
42 480 (11) Lehoux P, Poland B, Daudelin G. Focus group research and "the patient's view". *Soc*  
43 481 *Sci Med* 2006; 63(8):2091-2104.
- 44  
45 482 (12) Lehoux P, Poland B, Daudelin G. Focus group research and "the patient's view". *Soc*  
46 483 *Sci Med* 2006; 63(8):2091-2104.
- 47  
48 484 (13) Leech N, Onwuegbuzie A. An array of qualitative data analysis tools: A call for data  
49 485 analysis triangulation. *School Psychology Quarterly* 2007; 22(4):557-584.
- 50  
51 486 (14) Pope C, Van Royen P, Baker R. Qualitative methods in research on healthcare quality.  
52 487 *Qual Saf Health Care* 2002;(11):148-152.
- 53  
54 488 (15) TAMS website: <http://tamsys.sourceforge.net/>
- 55  
56  
57  
58  
59  
60

1  
2  
3  
4  
5  
6  
7  
8  
9  
10  
11  
12  
13  
14  
15  
16  
17  
18  
19  
20  
21  
22  
23  
24  
25  
26  
27  
28  
29  
30  
31  
32  
33  
34  
35  
36  
37  
38  
39  
40  
41  
42  
43  
44  
45  
46  
47  
48  
49  
50  
51  
52  
53  
54  
55  
56  
57  
58  
59  
60

- 489 (16) Butler CC, Rollnick S, Pill R, Maggs-Rapport F, Stott N. Understanding the culture of  
490 prescribing: qualitative study of general practitioners' and patients' perceptions of  
491 antibiotics for sore throats. *BMJ* 1998; 317(7159):637-642.
- 492 (17) Cockburn J, Pit S. Prescribing behaviour in clinical practice: patients' expectations and  
493 doctors' perceptions of patients' expectations--a questionnaire study. *BMJ* 1997;  
494 315(7107):520-523.
- 495 (18) Harbarth S, Albrich W, Brun-Buisson C. Outpatient antibiotic use and prevalence of  
496 antibiotic-resistant pneumococci in France and Germany: a sociocultural perspective.  
497 *Emerg Infect Dis* 2002; 8(12):1460-1467.
- 498 (19) Faber MS, Heckenbach K, Velasco E, Eckmanns T. Antibiotics for the common cold:  
499 expectations of Germany's general population. *Euro Surveill* 2010; 15(35):pii=19655.
- 500 (20) Vasquez GA, Siu HR, Luna EM, Eduardo M, Reyes KC, Zervos MJ. Risk factors for  
501 Quinolone-resistant *Escherichia coli* urinary tract infection. *Infect Dis Clin Pract*  
502 2011; 17(5):309-313.
- 503 (21) Hooper DC. Emerging mechanisms of fluoroquinolone resistance. *Emerg Infect Dis*  
504 2001; 7(2):337-341.
- 505 (22) Kern WV, Nink K, Steib-Bauert M, Schröder H. Regional variation in outpatient  
506 antibiotic prescribing in Germany. *Infection* 2006; 34(5):269-273.
- 507 (23) Goossens H, Ferech M, Vander SR, Elseviers M. Outpatient antibiotic use in Europe  
508 and association with resistance: a cross-national database study. *Lancet* 2005;  
509 365(9459):579-587.
- 510 (24) Deja M, Nachtigall I, Halle E, Kastrup M, Guill MM, Spies CD. Antibiotikatherapie -  
511 Strategien für die Verordnung von Antibiotika in der Intensivmedizin [Strategies in  
512 the treatment of infections with antibiotics in intensive care medicine]. *Anesthesiol*  
513 *Intensivmed Notfallmed Schmerzther* 2007; 42(2):108-115.
- 514 (25) Guerra CM, Pereira CA, Neves Neto AR, Cardo DM, Correa L. Physicians'  
515 perceptions, beliefs, attitudes, and knowledge concerning antimicrobial resistance in a  
516 Brazilian teaching hospital. *Infect Control Hosp Epidemiol* 2007; 28(12):1411-1414.
- 517 (26) Srinivasan A, Song X, Richards A, Sinkowitz-Cochran R, Cardo D, Rand C. A survey  
518 of knowledge, attitudes, and beliefs of house staff physicians from various specialties  
519 concerning antimicrobial use and resistance. *Arch Intern Med* 2004; 164(13):1451-  
520 1456.
- 521 (27) Avorn J, Solomon DH. Cultural and economic factors that (mis)shape antibiotic use:  
522 the nonpharmacologic basis of therapeutics. *Ann Intern Med* 2000; 133(2):128-135.  
523  
524

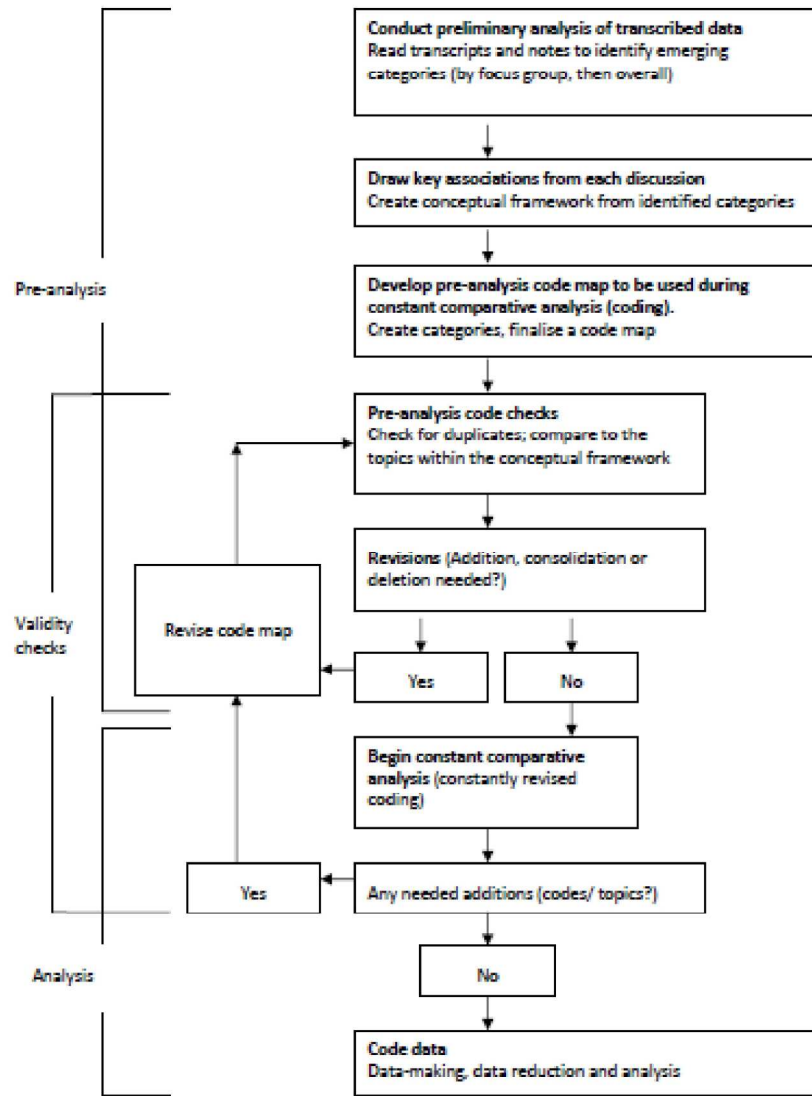

Figure 1 Plan for data-making, data reduction and analysis  
194x264mm (300 x 300 DPI)

# Qualitative research

These are the questions that BMJ editors should consider when appraising papers presenting original qualitative research (although we don't routinely use a checklist for this):

- Was the research question clearly defined? **YES**
- Overall, did the researcher make explicit in the account the theoretical framework and methods used at every stage of the research? **YES**
- Was the context clearly described? **YES**
- Was the sampling strategy clearly described and justified? **YES**
- Was the sampling strategy theoretically comprehensive to ensure the generalisability of the conceptual analysis (diverse range of individuals and settings, for example)? **YES**
- How was the fieldwork undertaken? Was it described in detail? **YES**
- Could the evidence (fieldwork notes, interview transcripts, recordings, documentary analysis, etc) could be inspected independently by others: if relevant, could the process of transcription be independently inspected? **YES**
- Were the procedures for data analysis clearly described and theoretically justified? Did they relate to the original research questions? **YES** How were themes and concepts identified from the data?
- Was the analysis repeated by more than one researcher to ensure reliability? **YES – at different phases**
- Did the investigator make use of quantitative evidence to test qualitative conclusions where appropriate? **YES – reference to a separate cross-sectional component conducted by the author**
- Did the investigator give evidence of seeking out observations that might have contradicted or modified the analysis? **YES**
- Was sufficient of the original evidence presented systematically in the written account to satisfy the sceptical reader of the relation between the interpretation and the evidence (for example, were quotations numbered and sources given)? **YES**
